# Supplementary material for: Demographic and mental health assessments in the adolescent brain and cognitive development study: Updates and age-related trajectories
Source: PubMed Central journal article supplement — Dev Cogn Neurosci. 2021 Oct 29;52:101031. doi: 10.1016/j.dcn.2021.101031 (PMC8579129; doi:10.1016/j.dcn.2021.101031), 2021-10-29

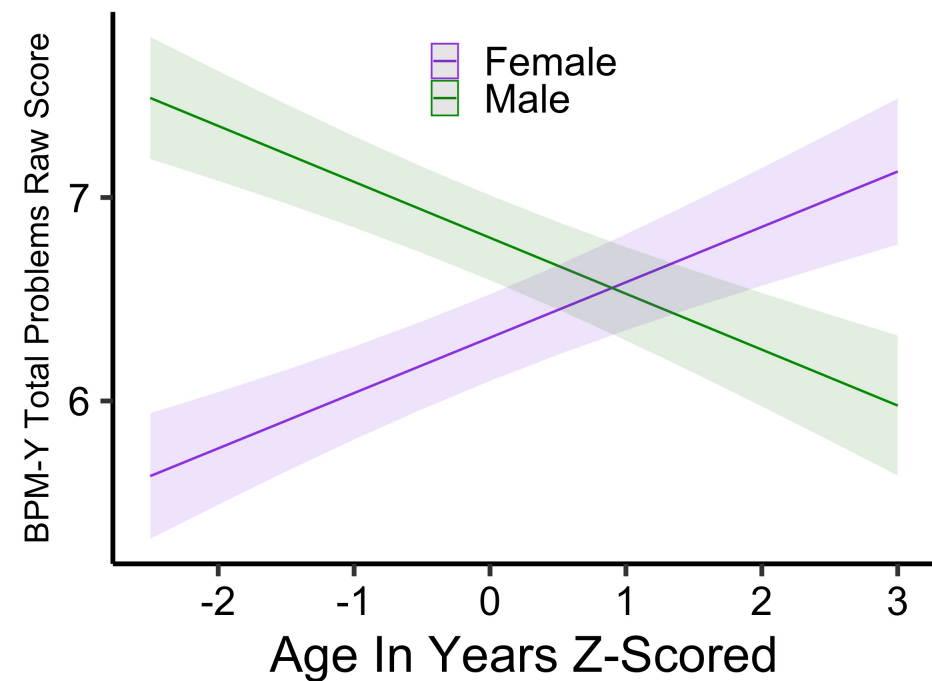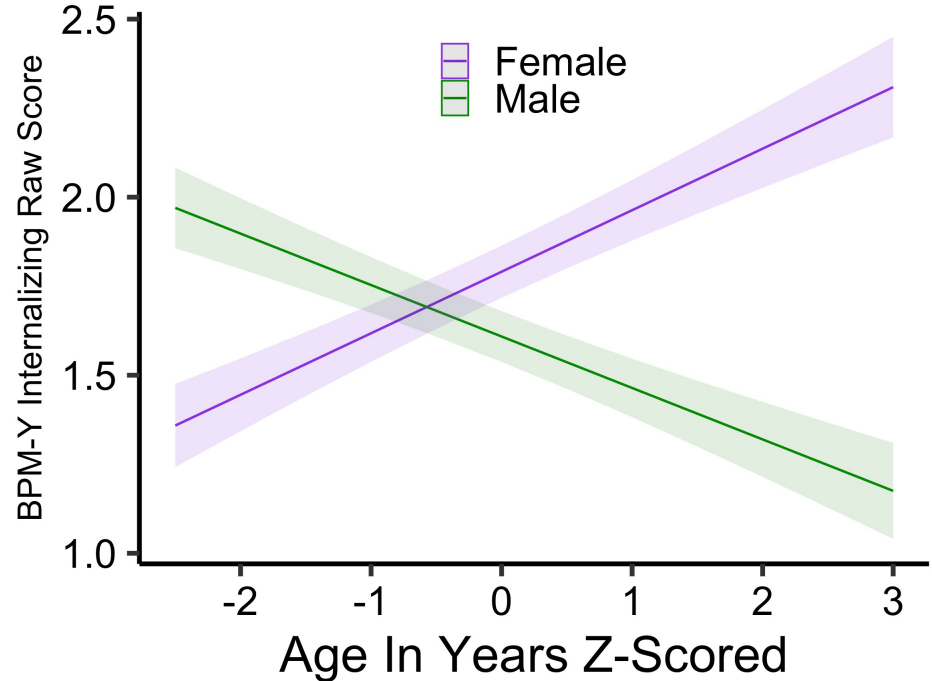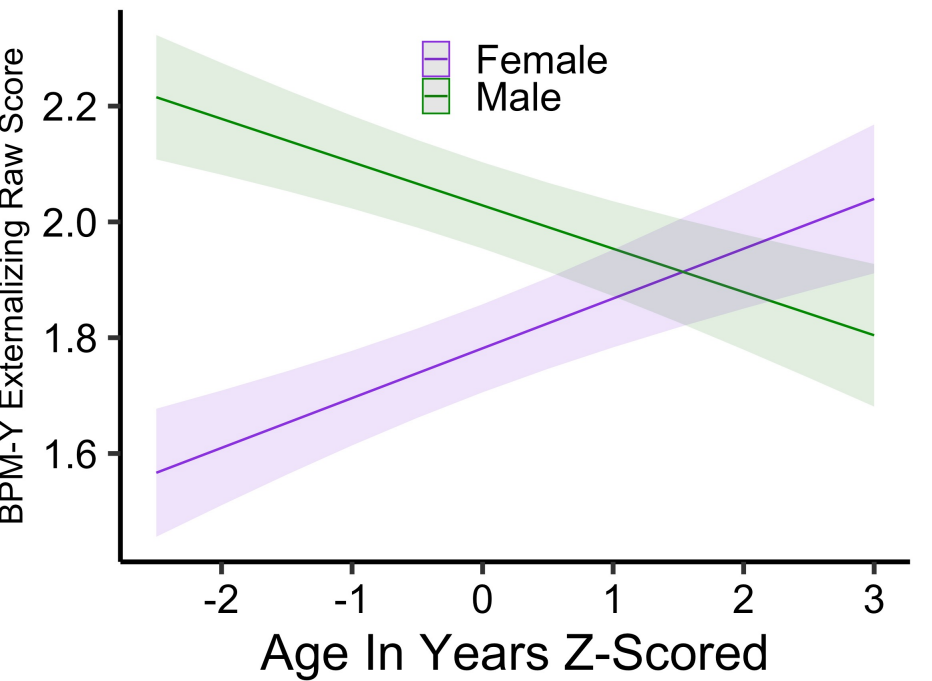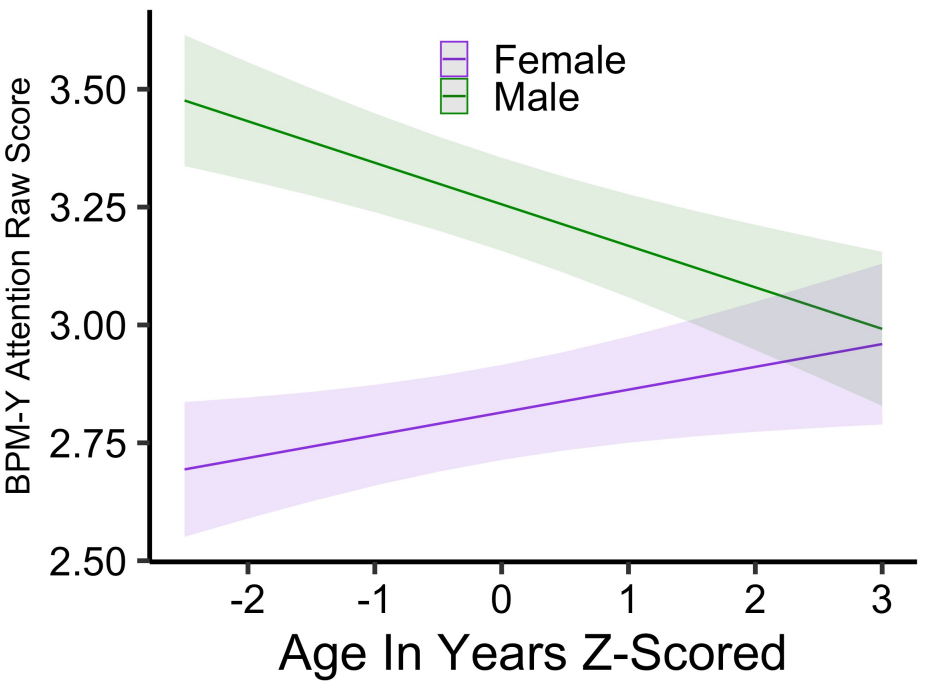

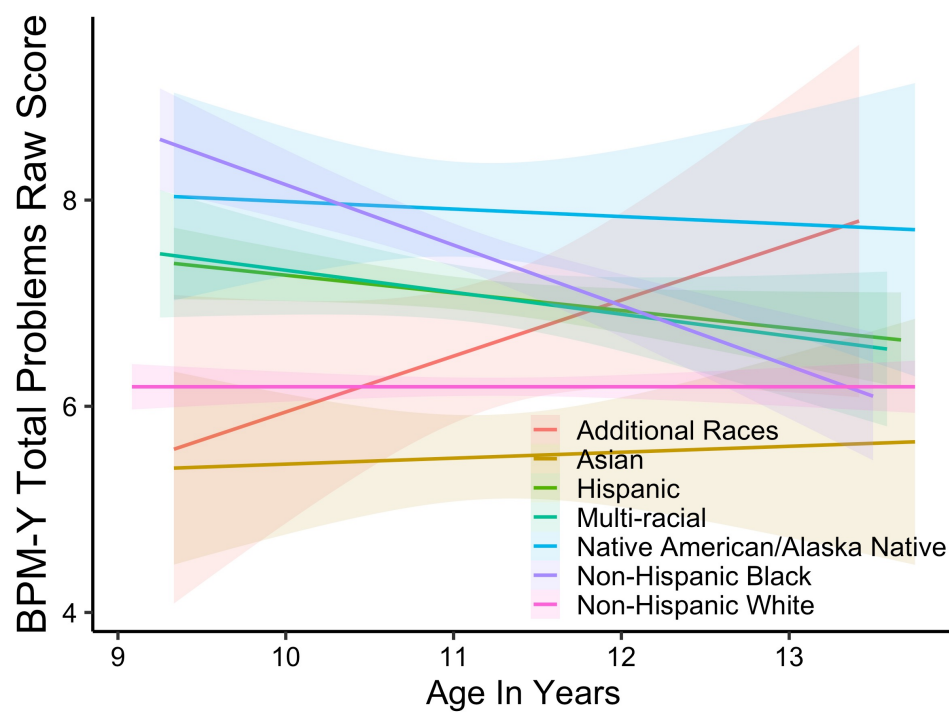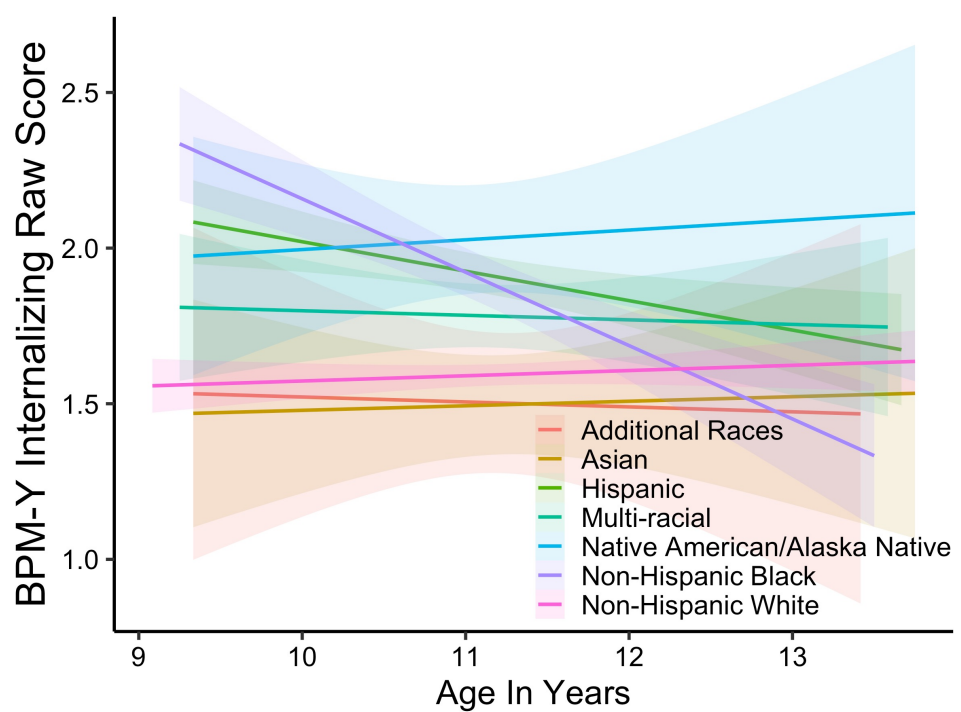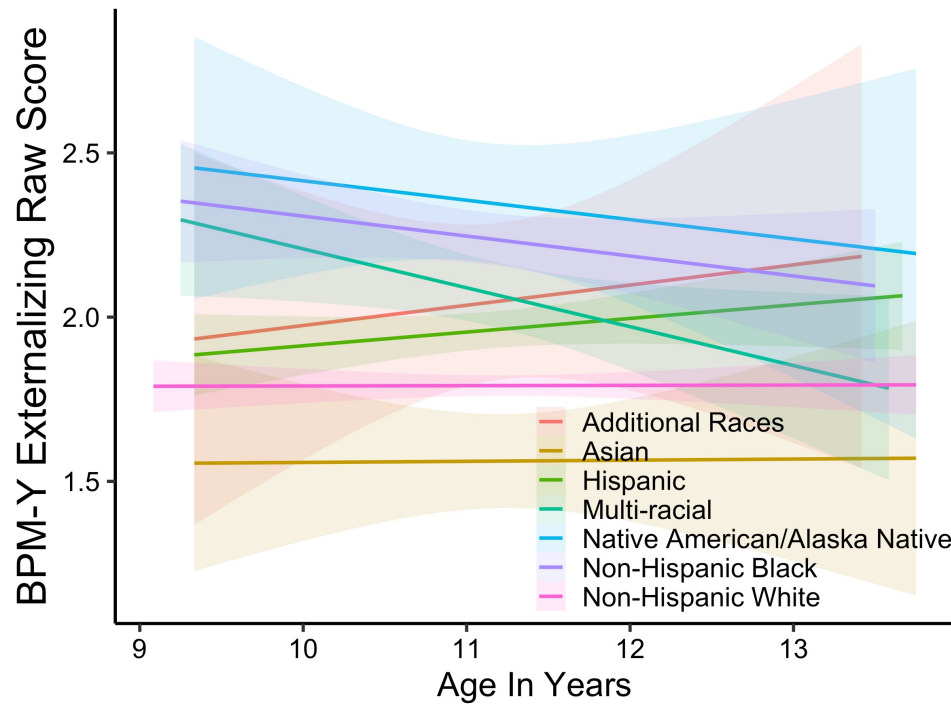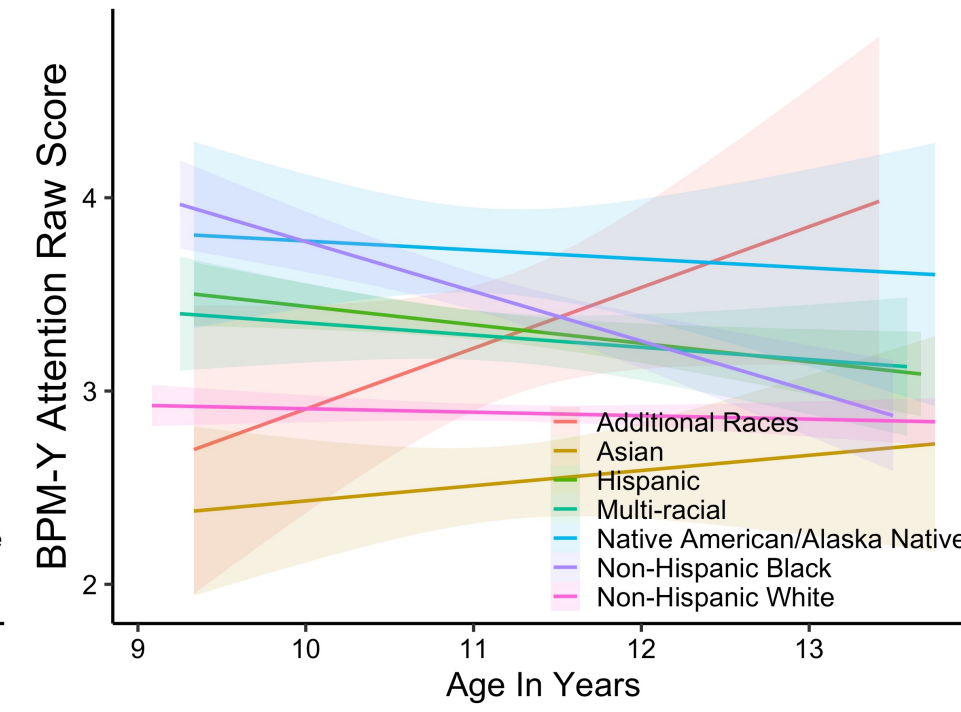

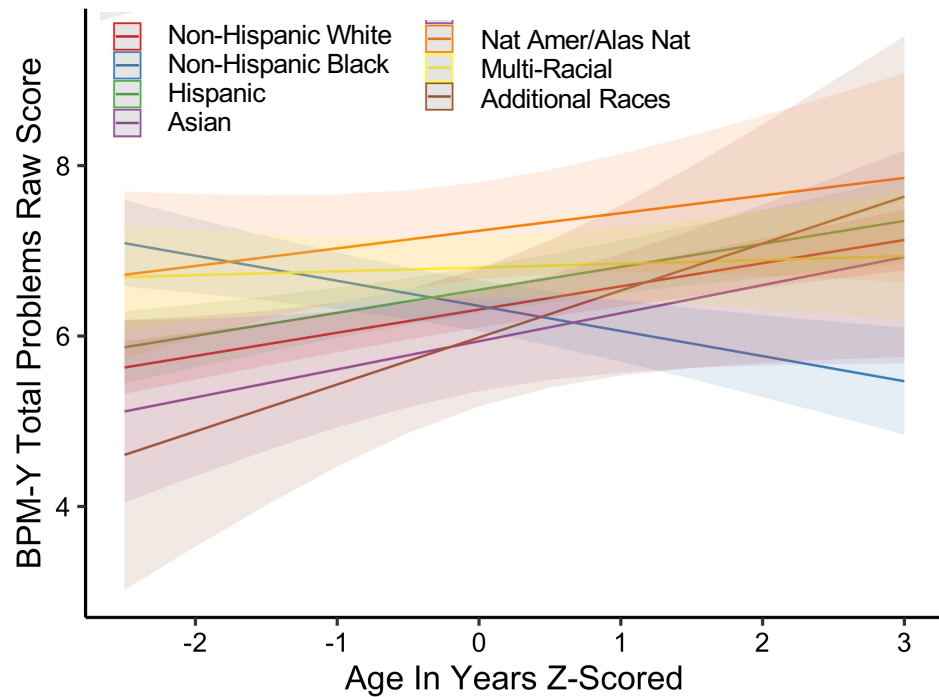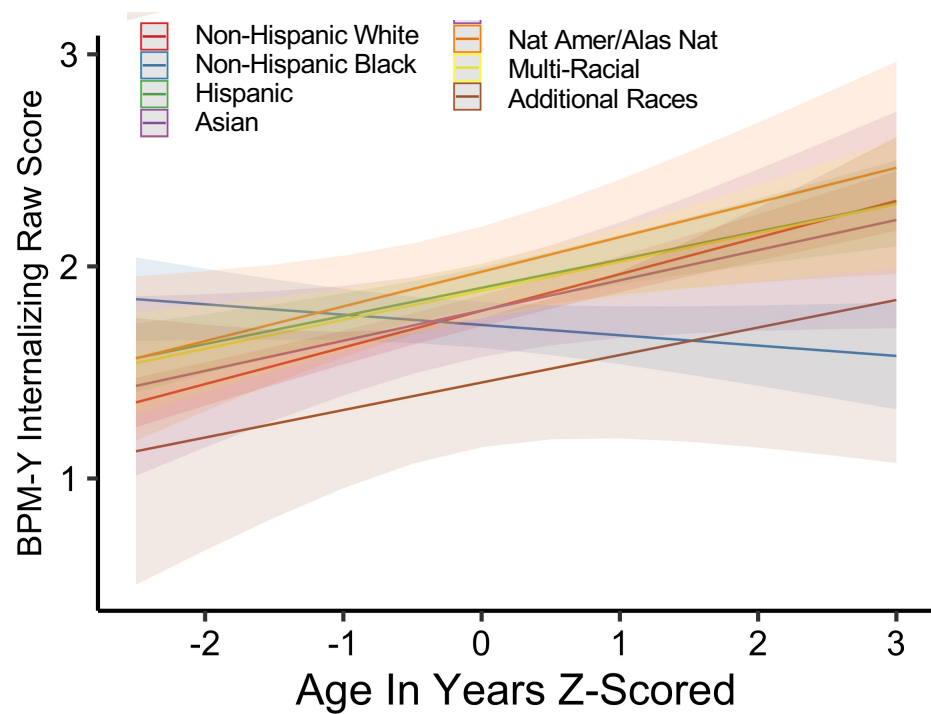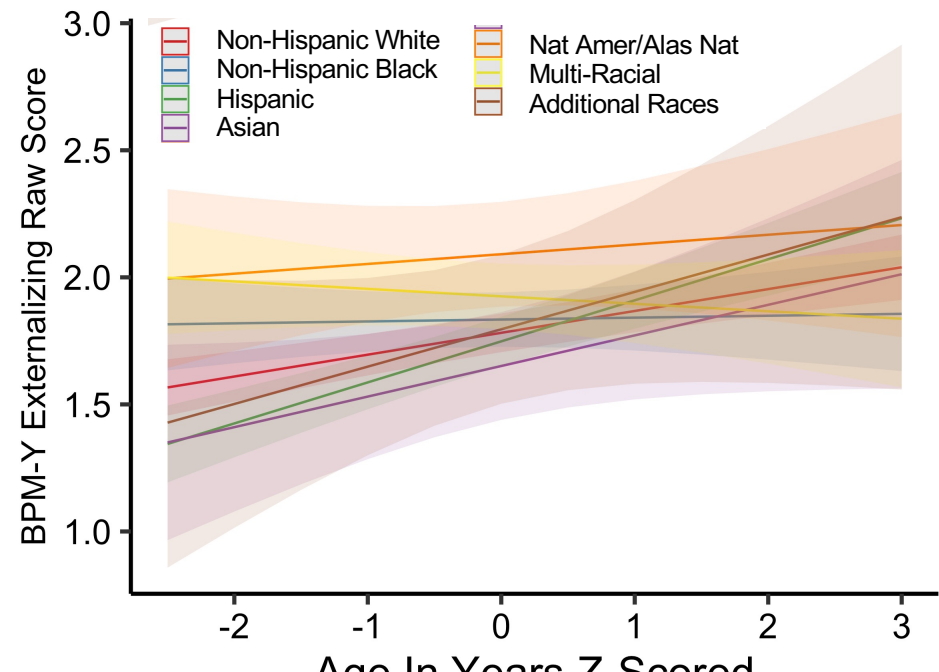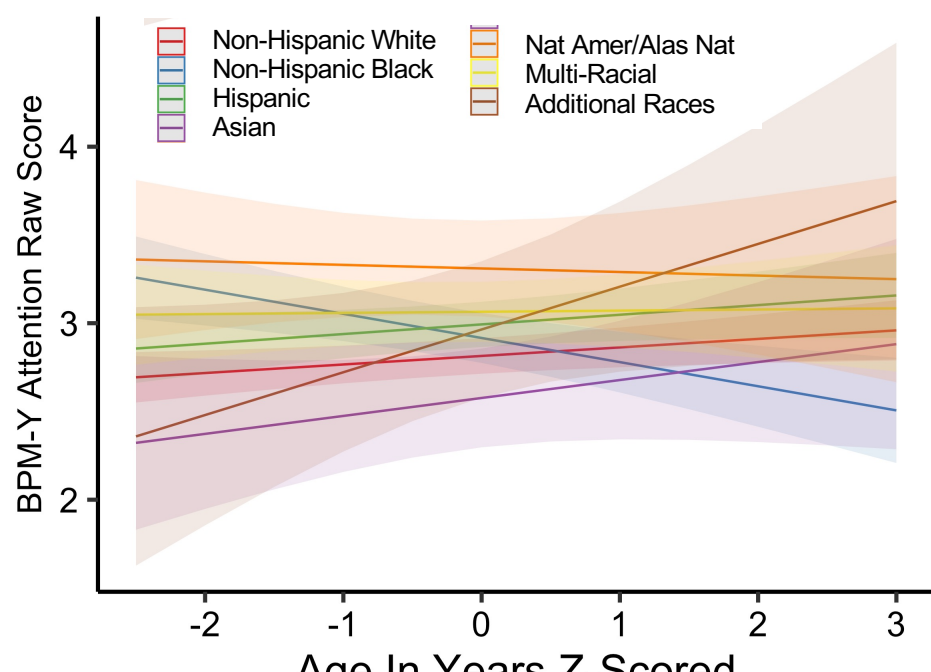

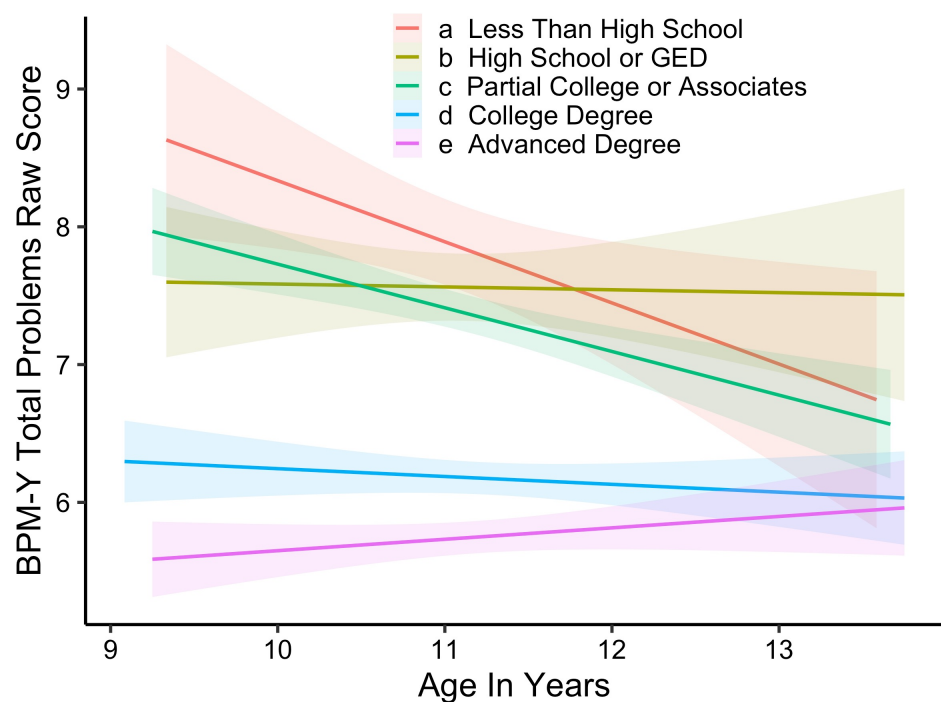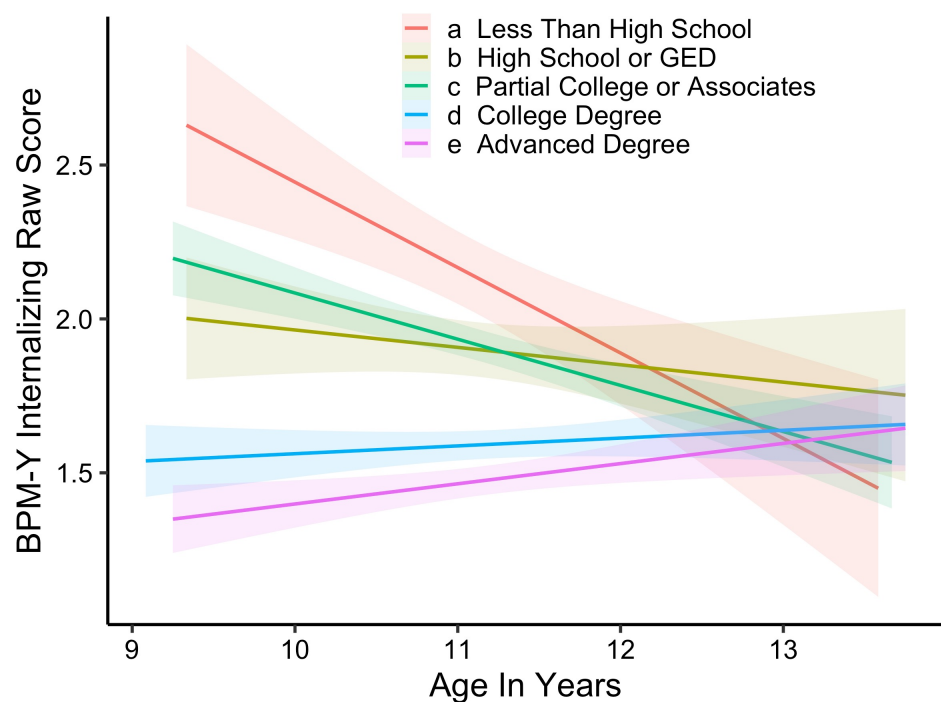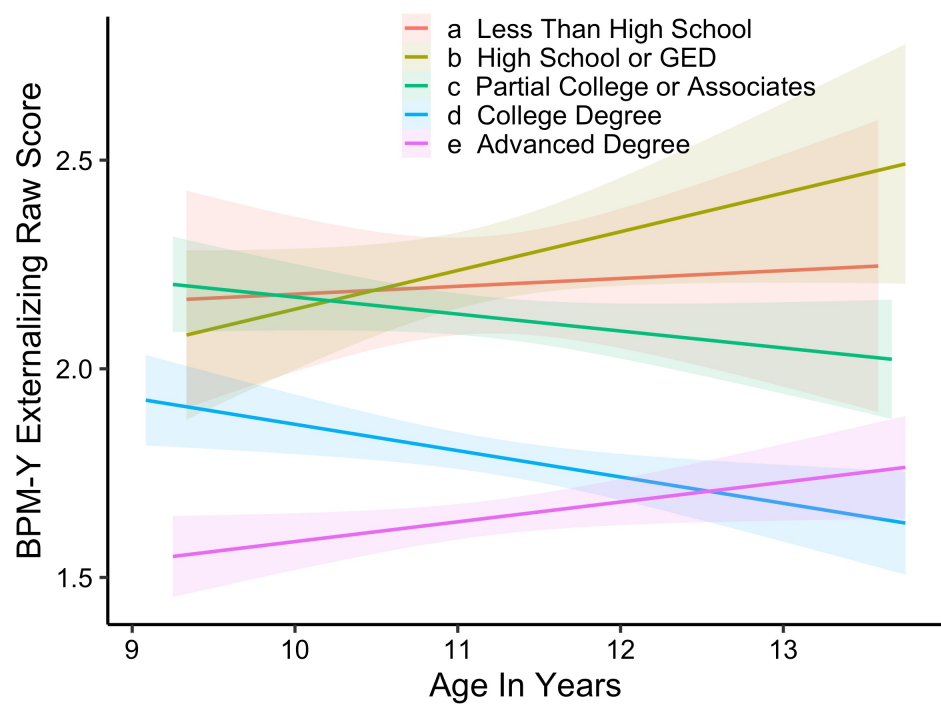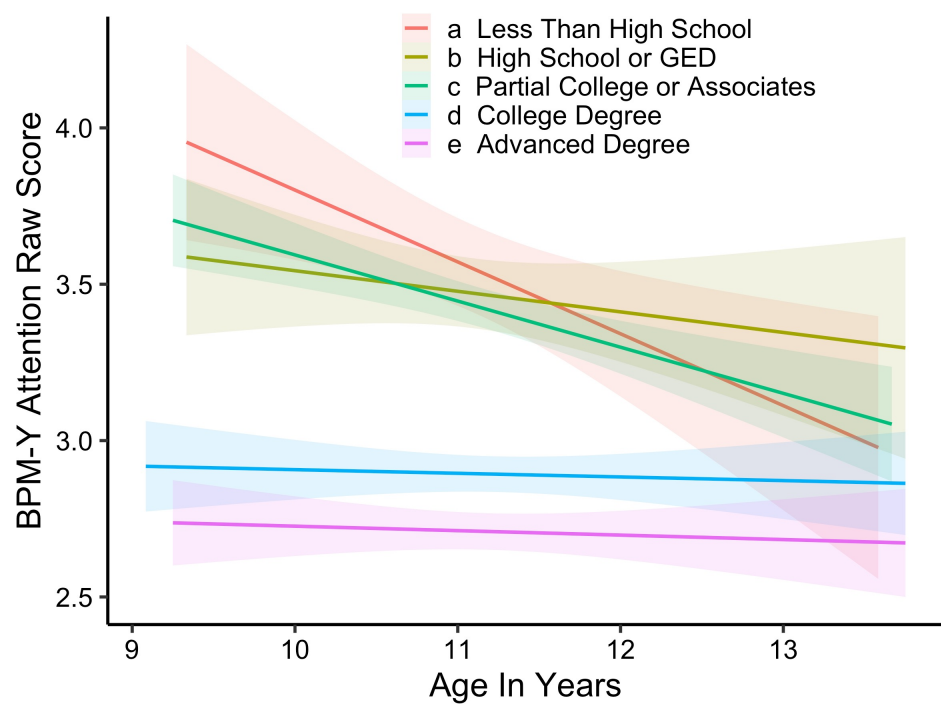



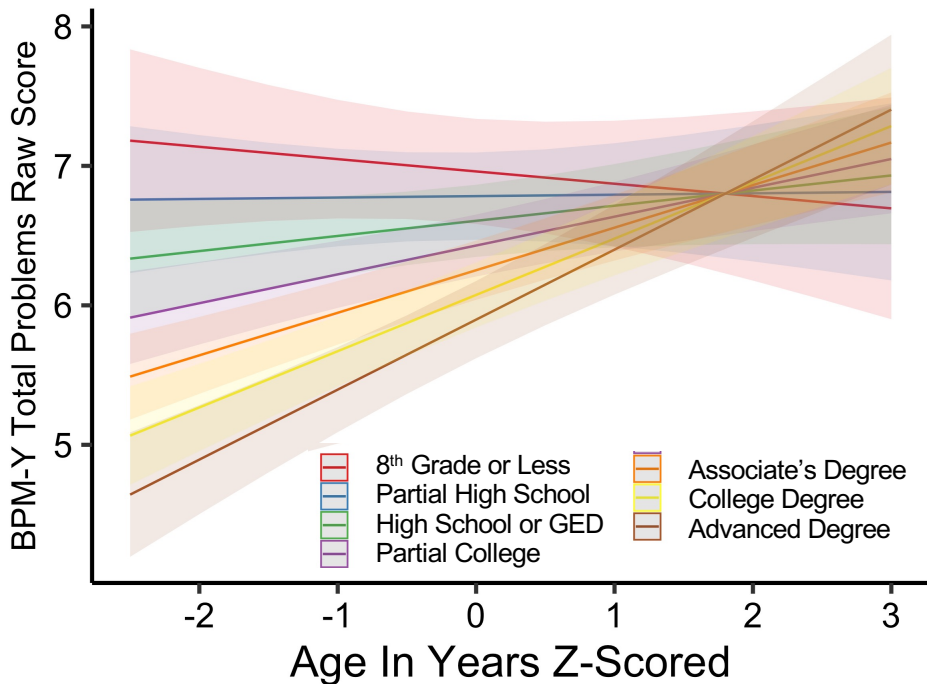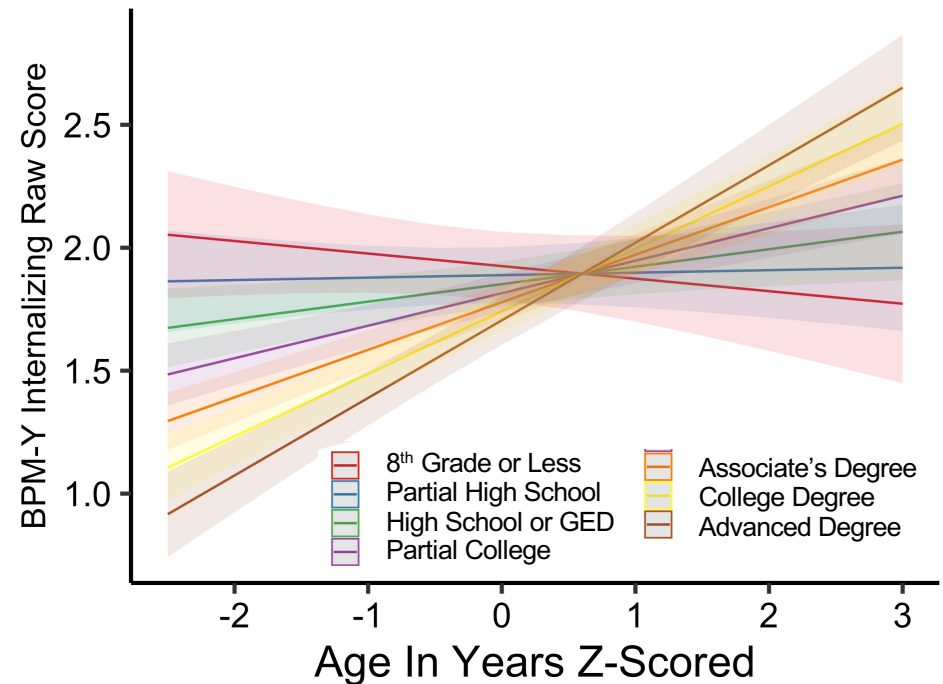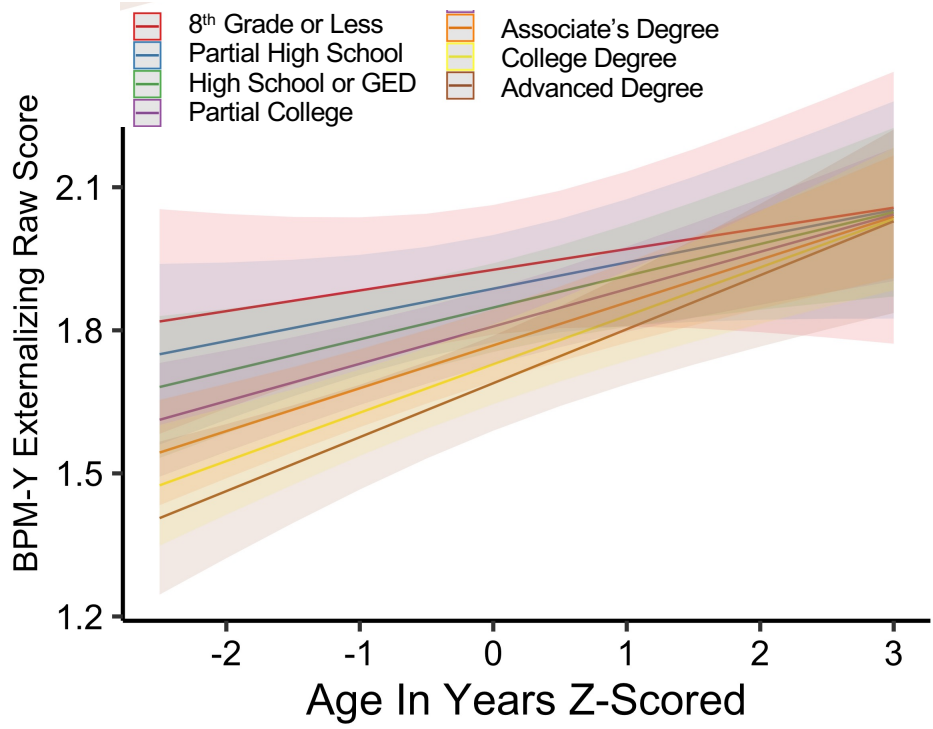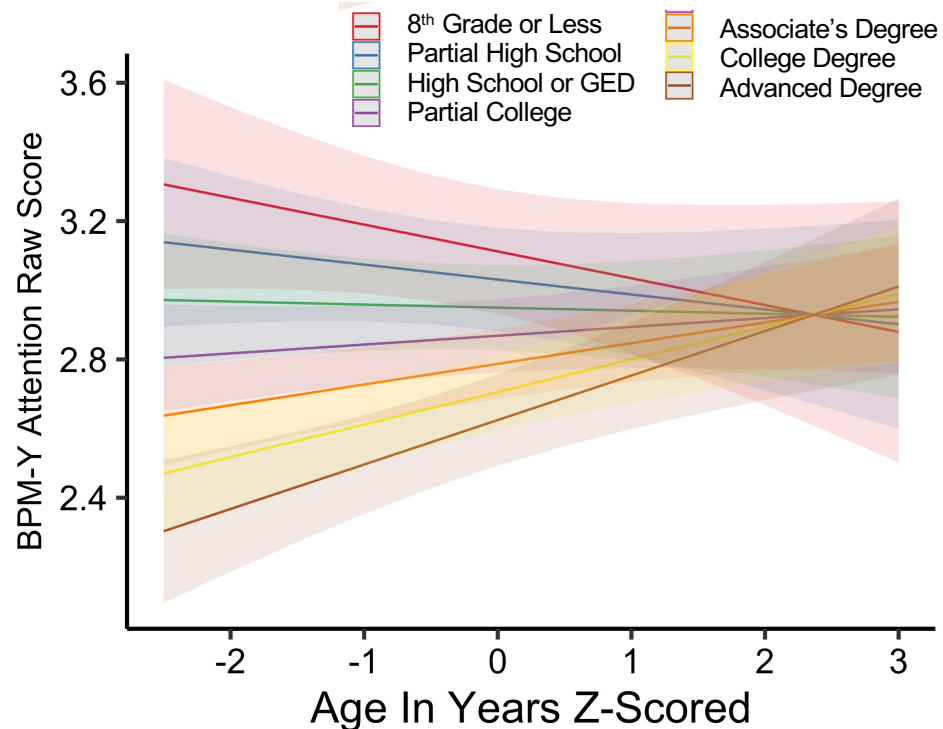

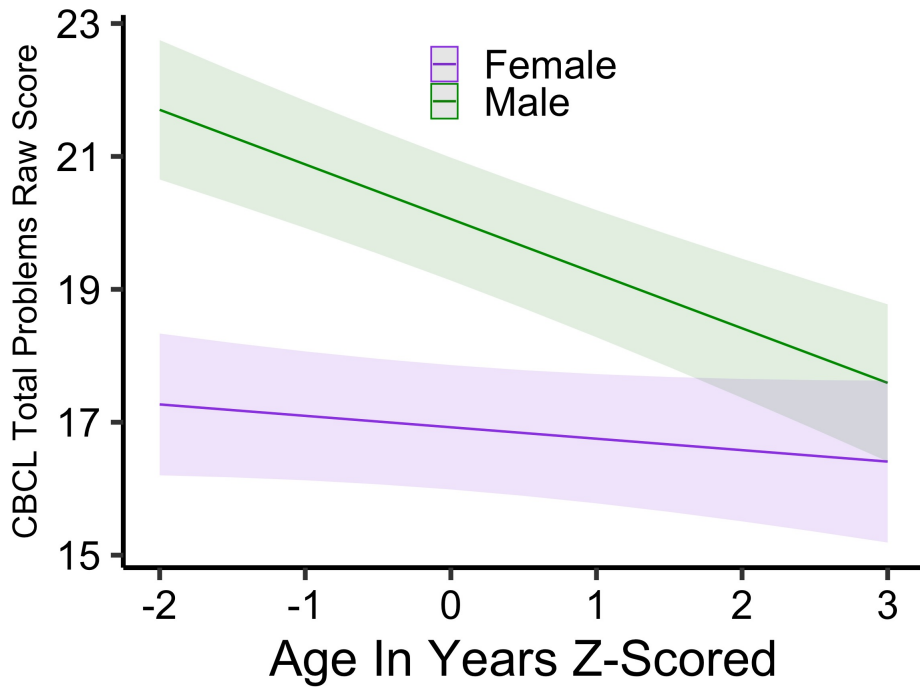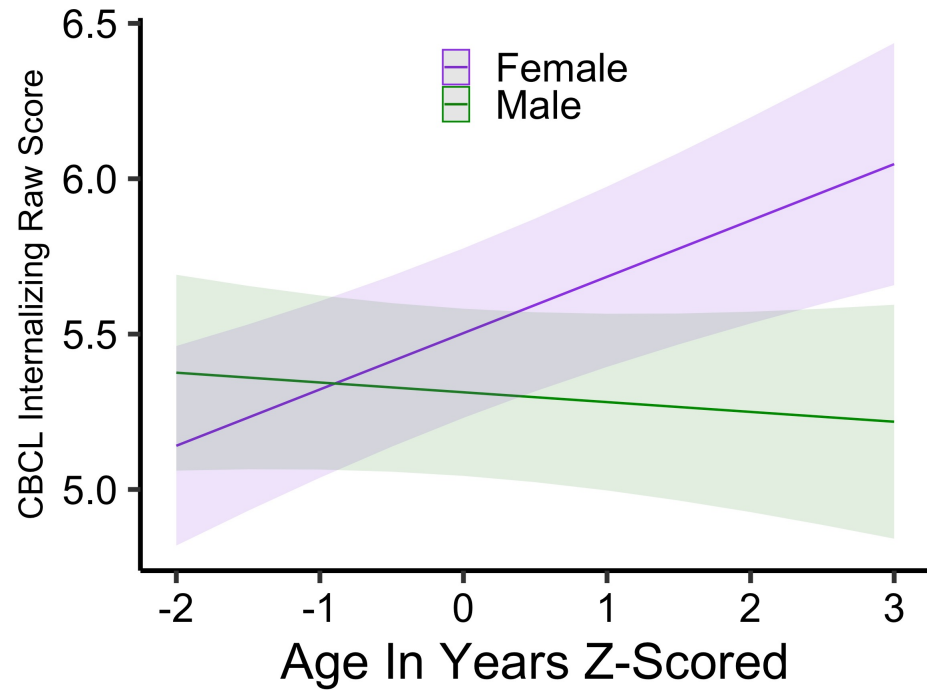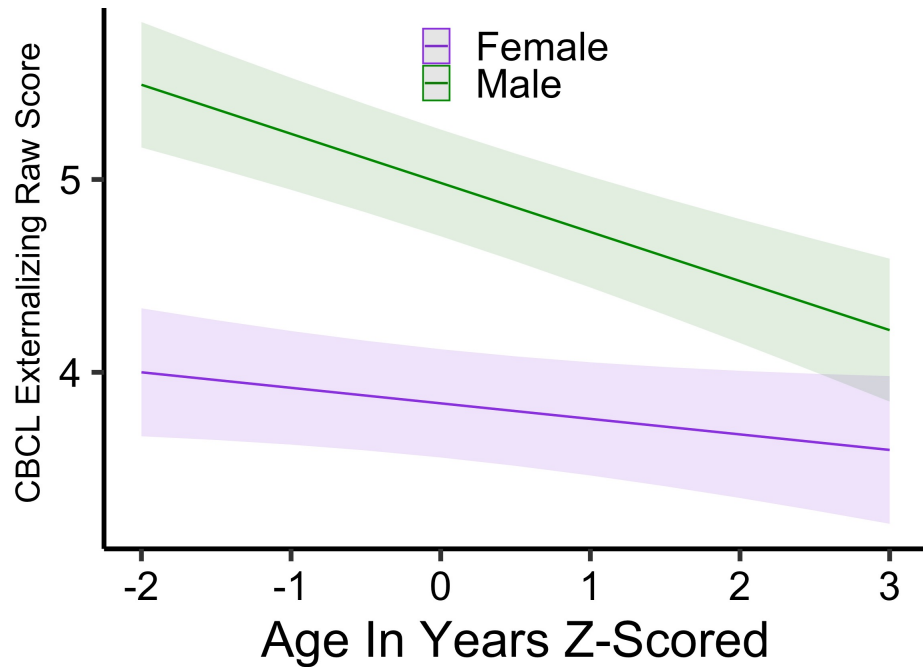

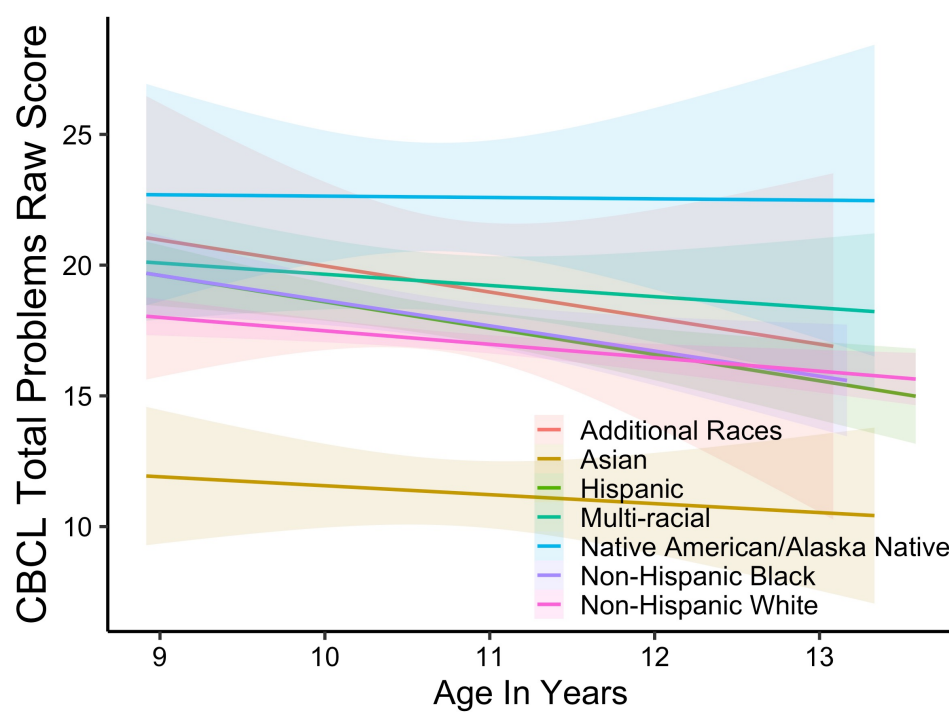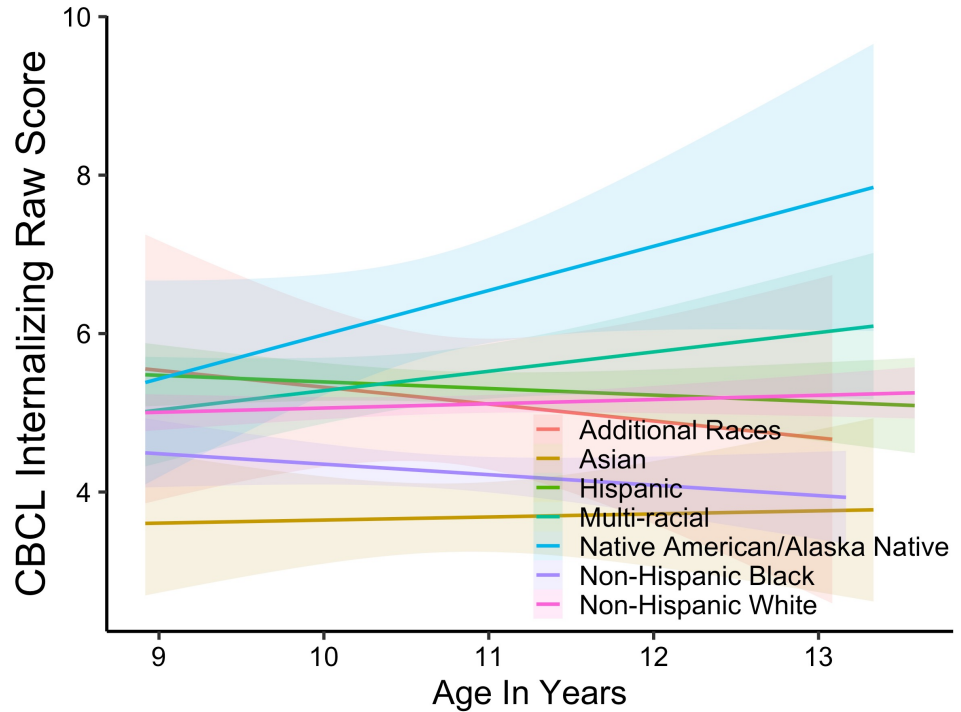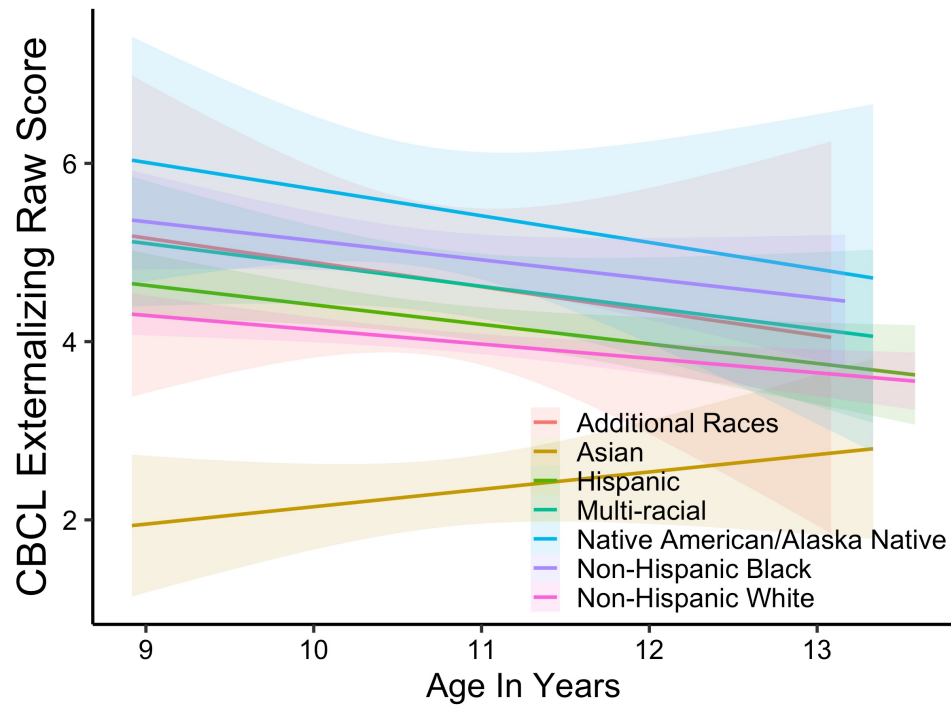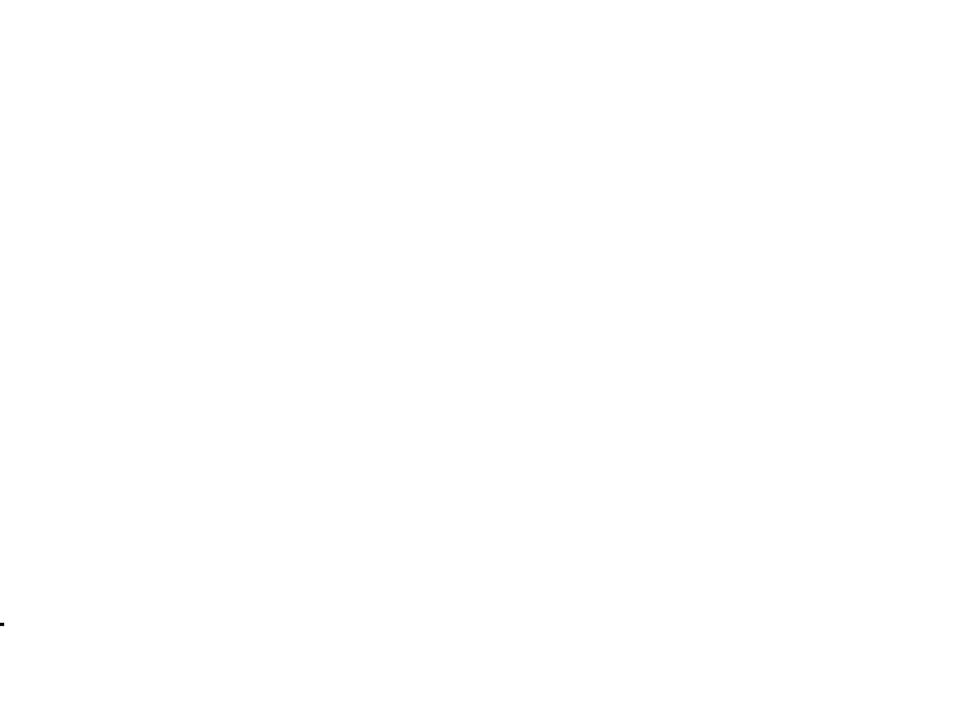

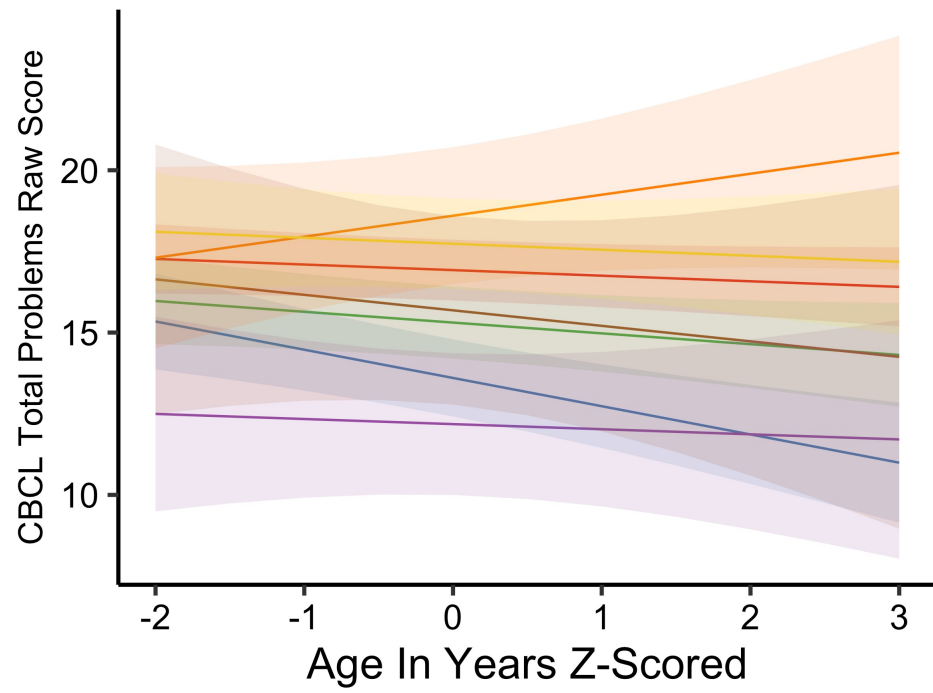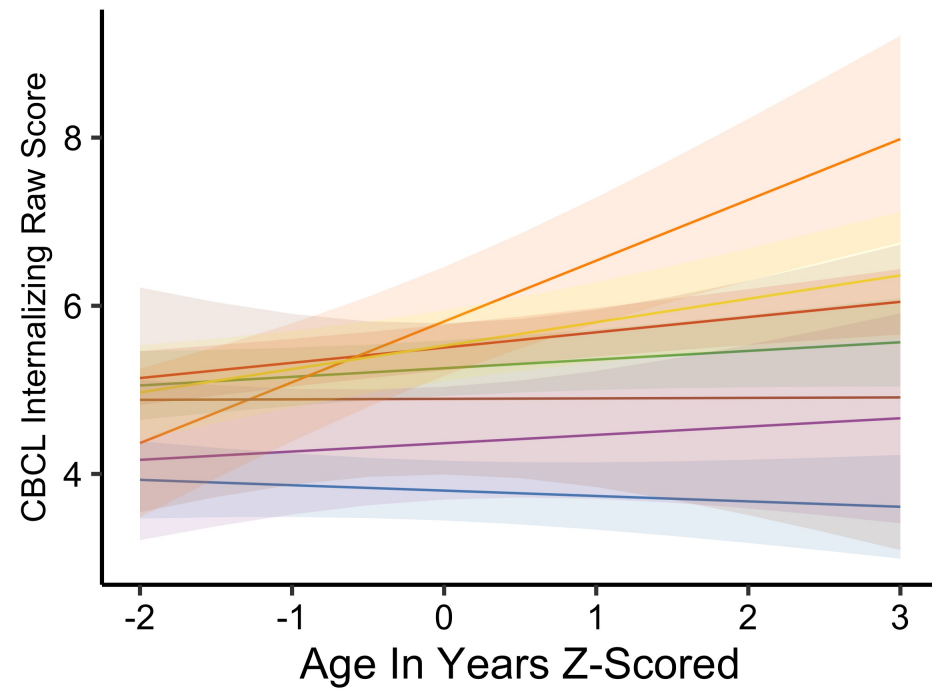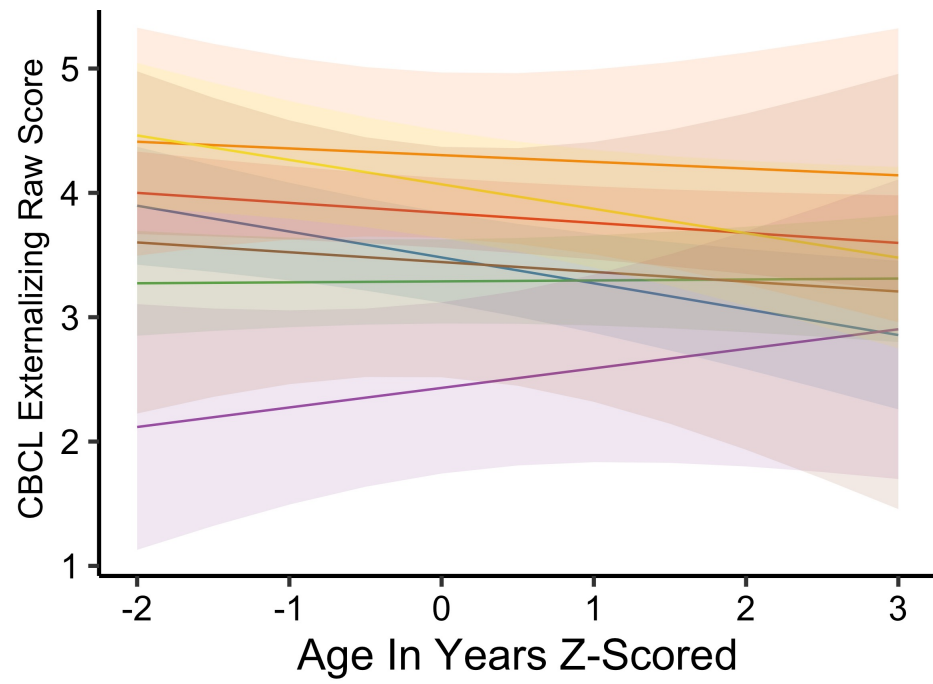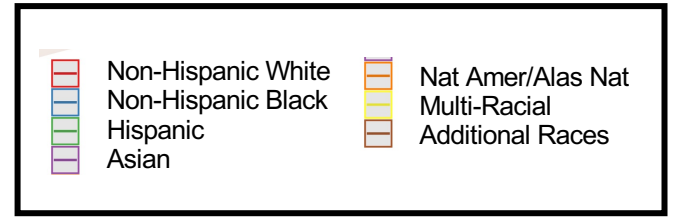

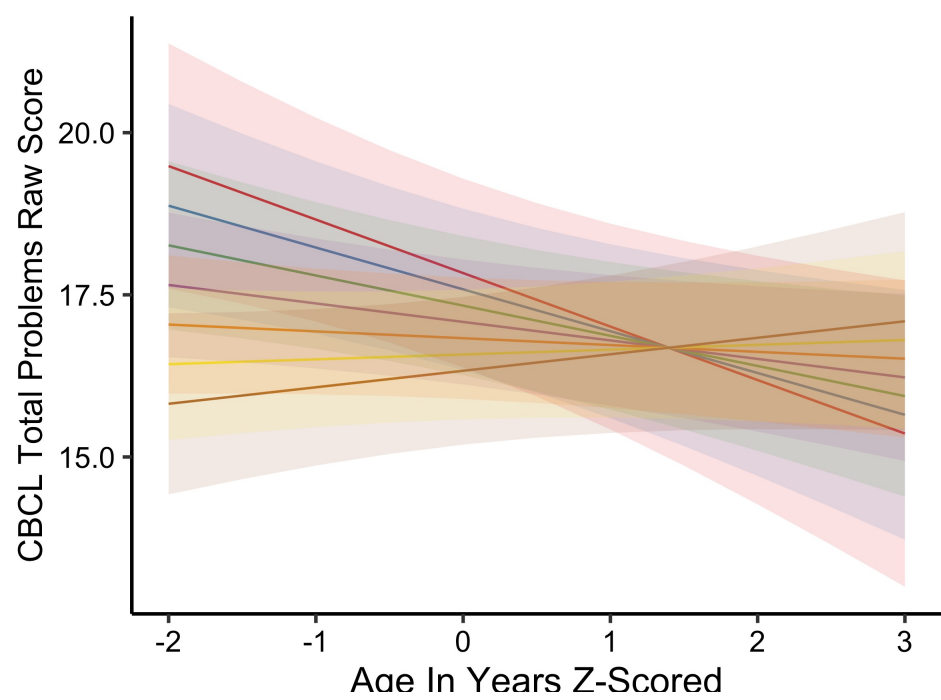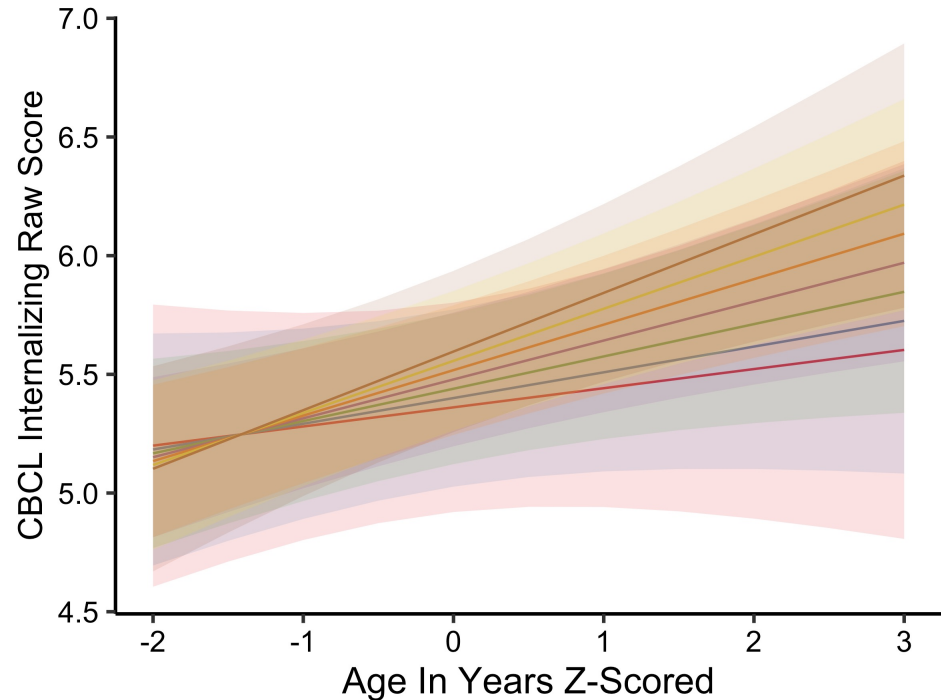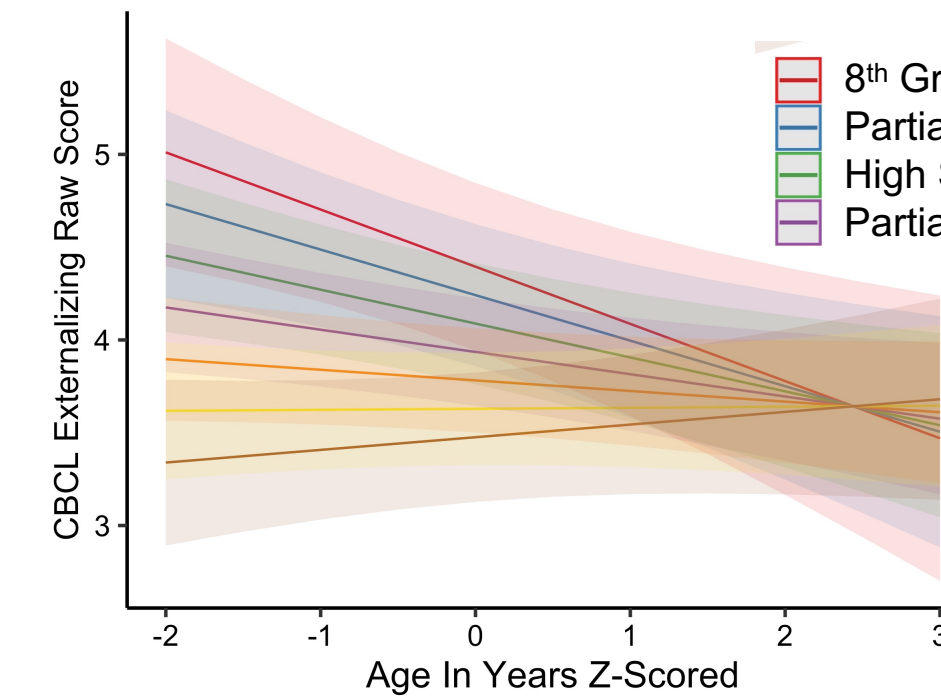

- ▬ 8<sup>th</sup> Grade or Less
- ▬ Partial High School
- ▬ High School or GED
- ▬ Partial College
- ▬ Associate's Degree
- ▬ College Degree
- ▬ Advanced Degree



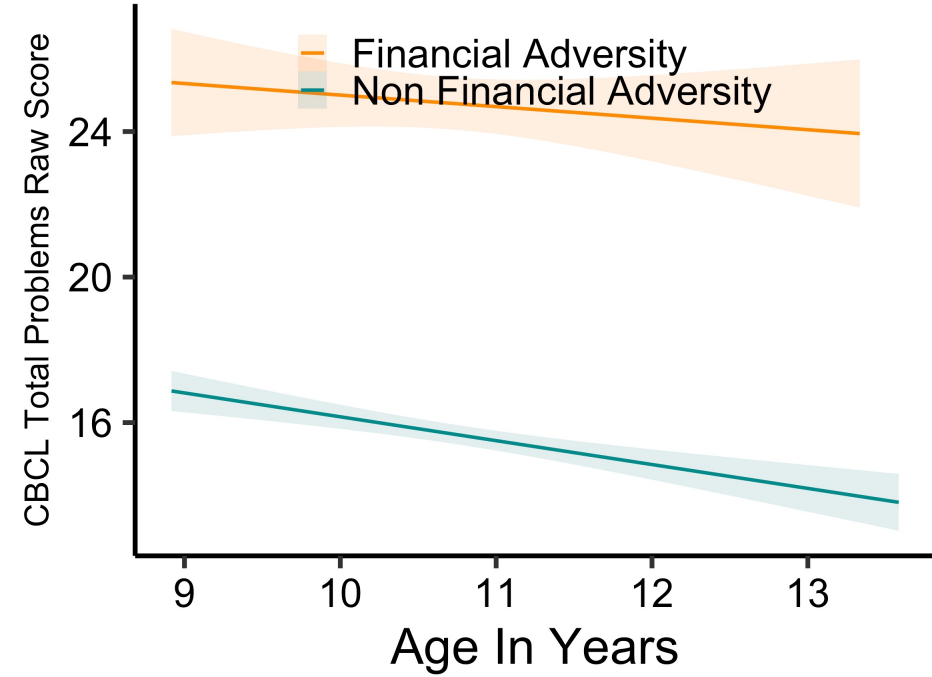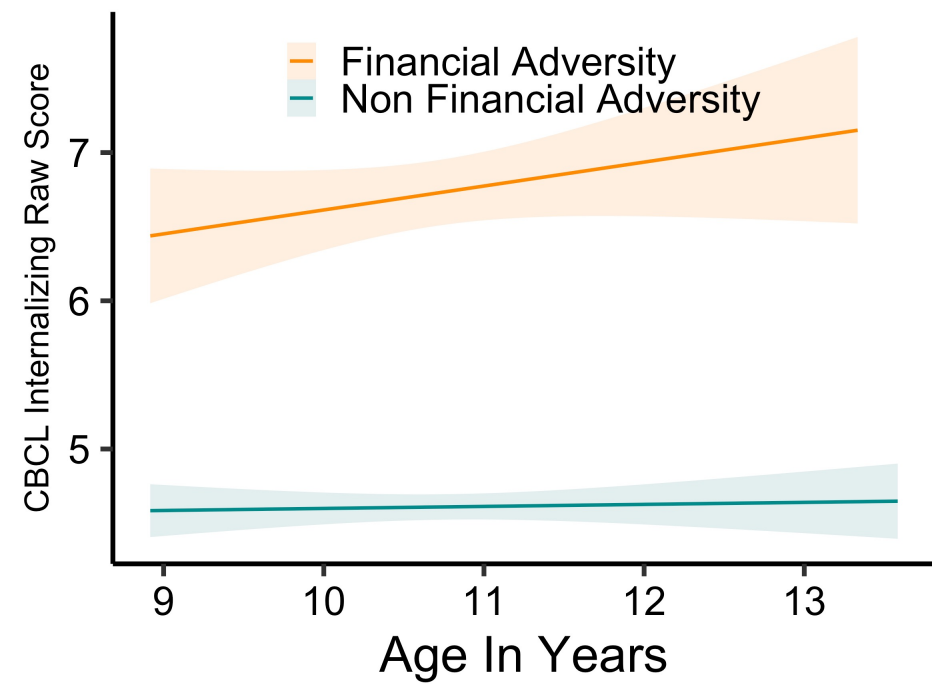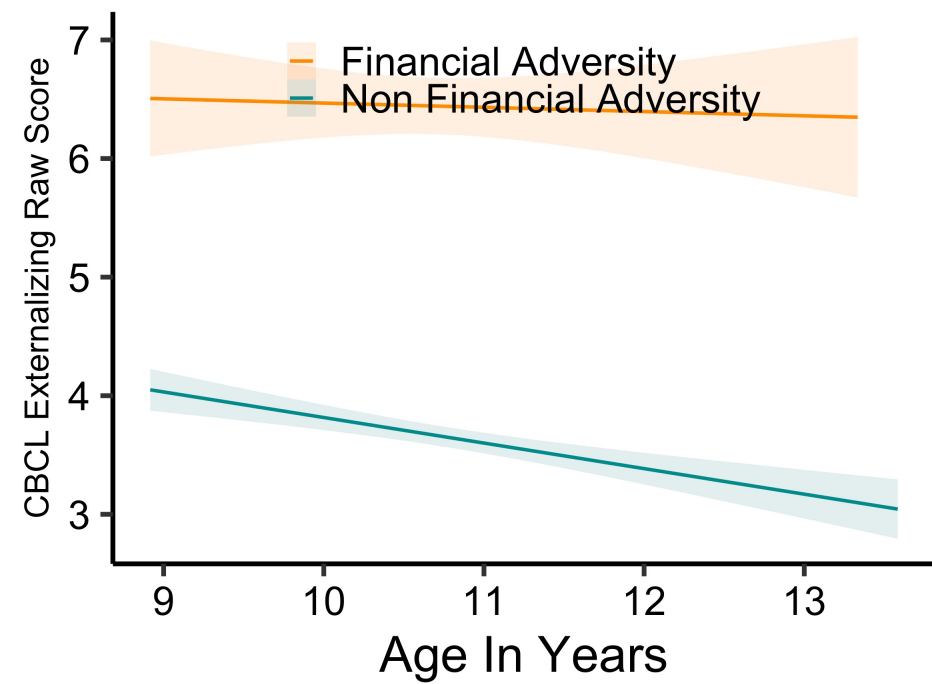

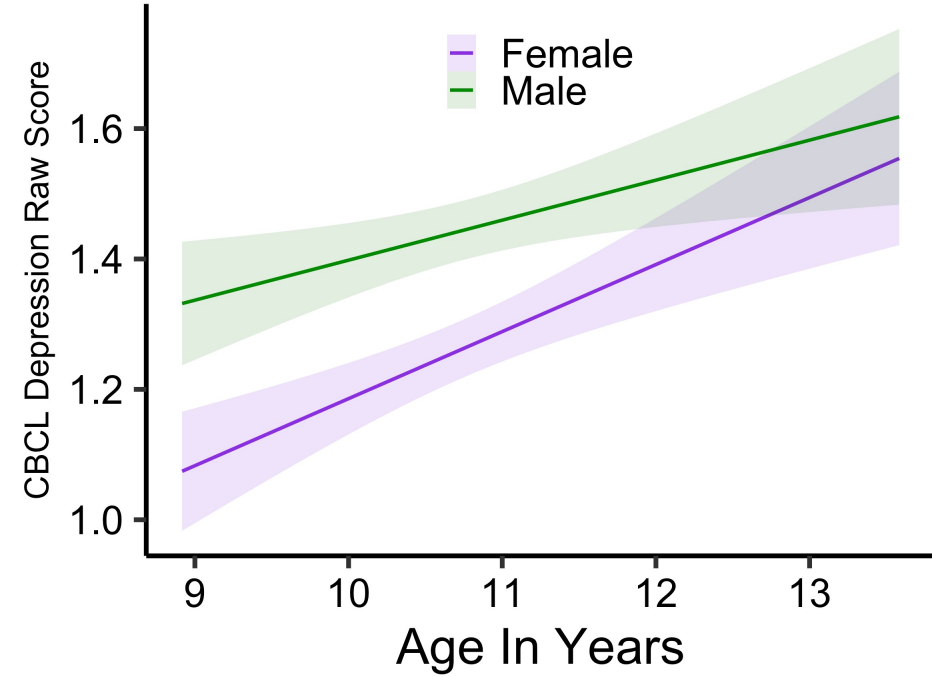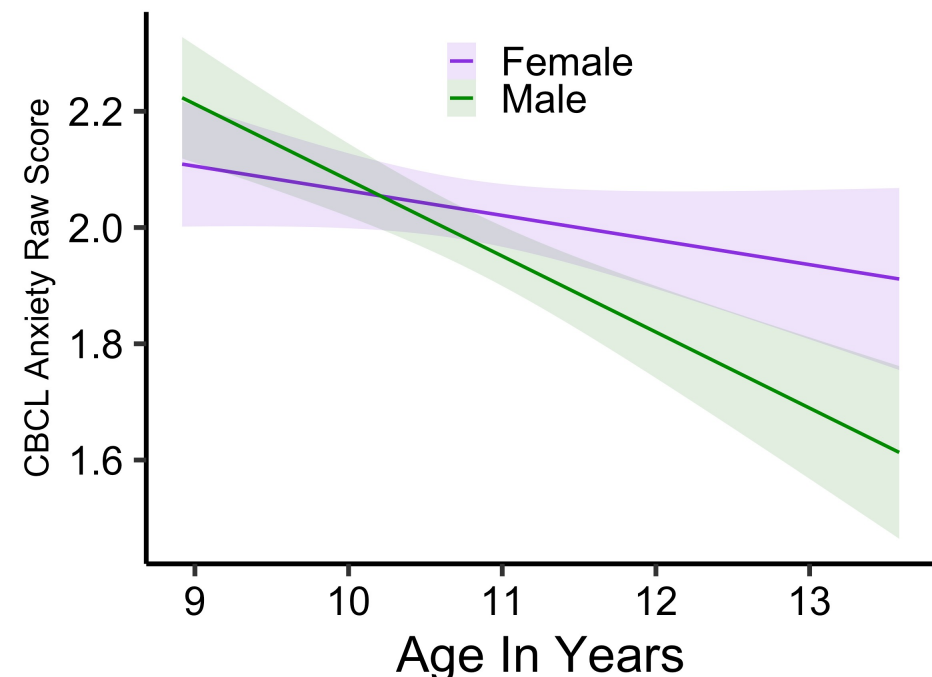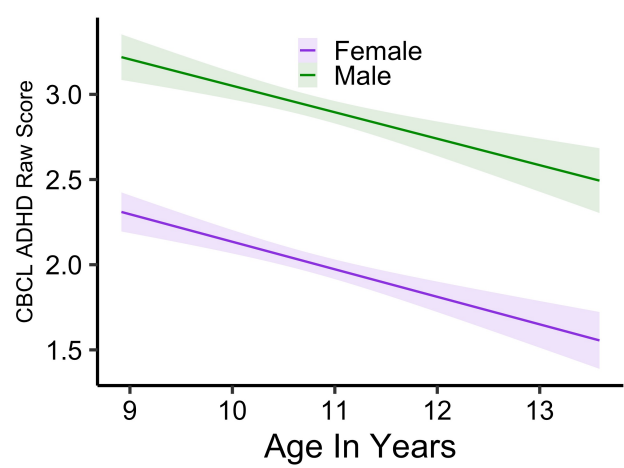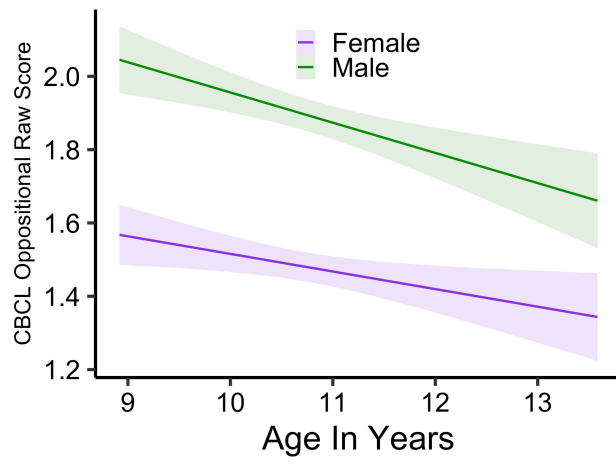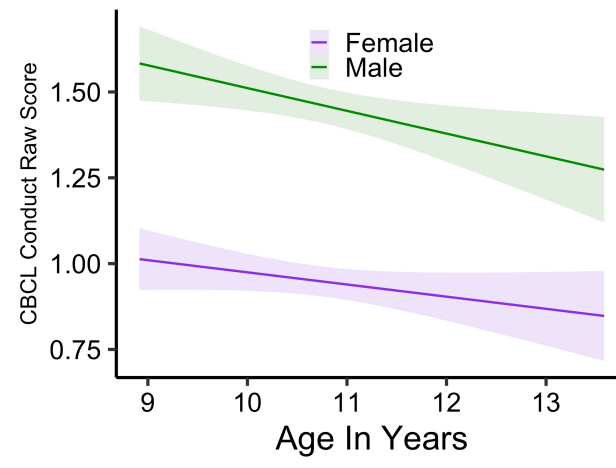

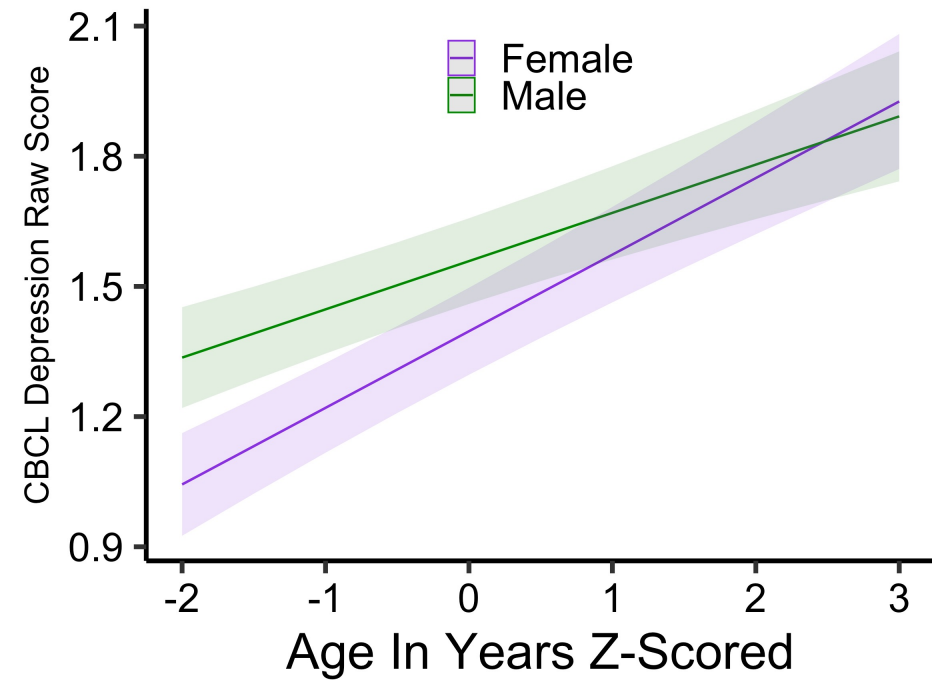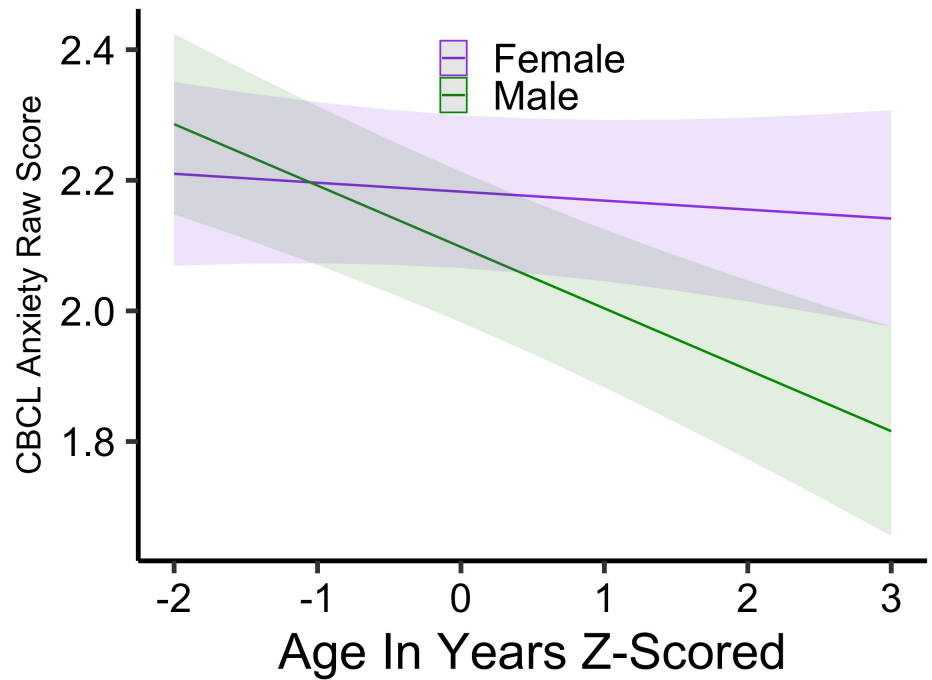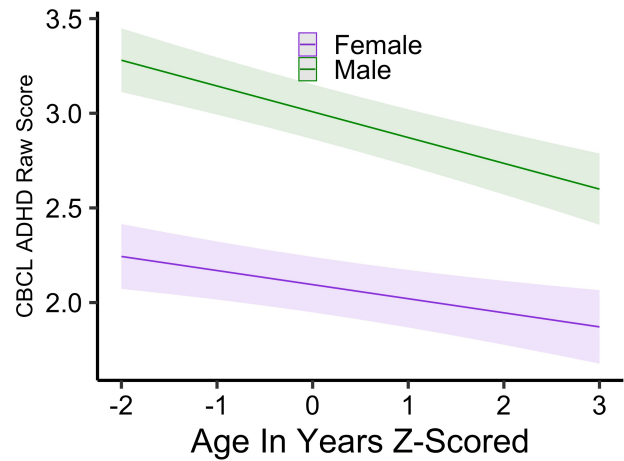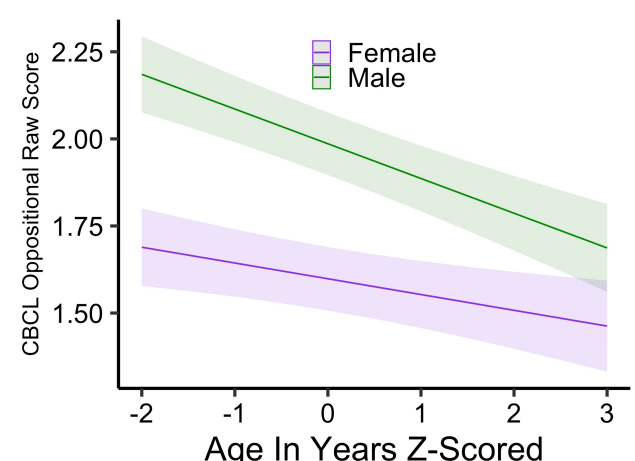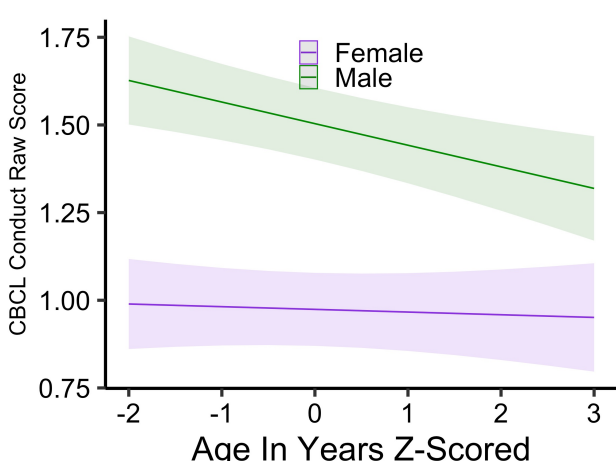

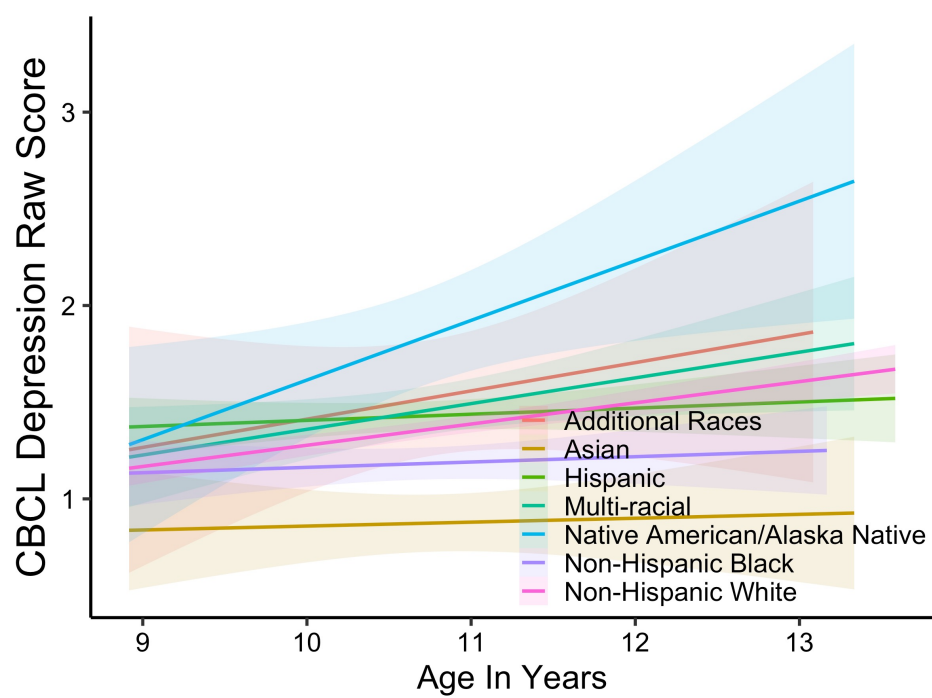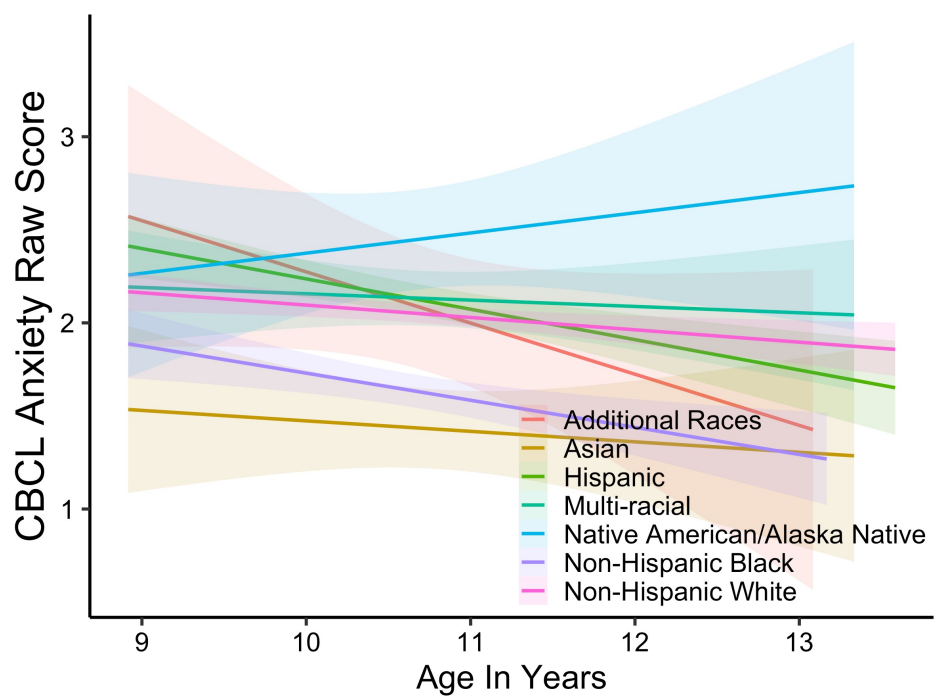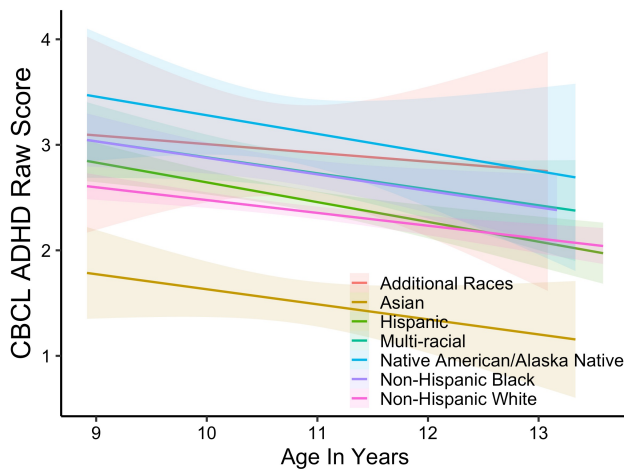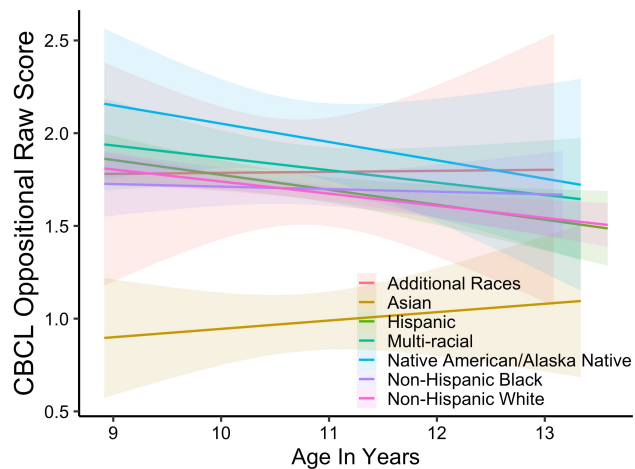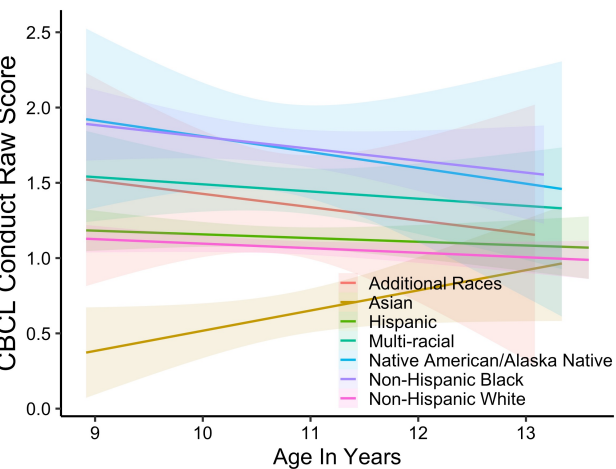

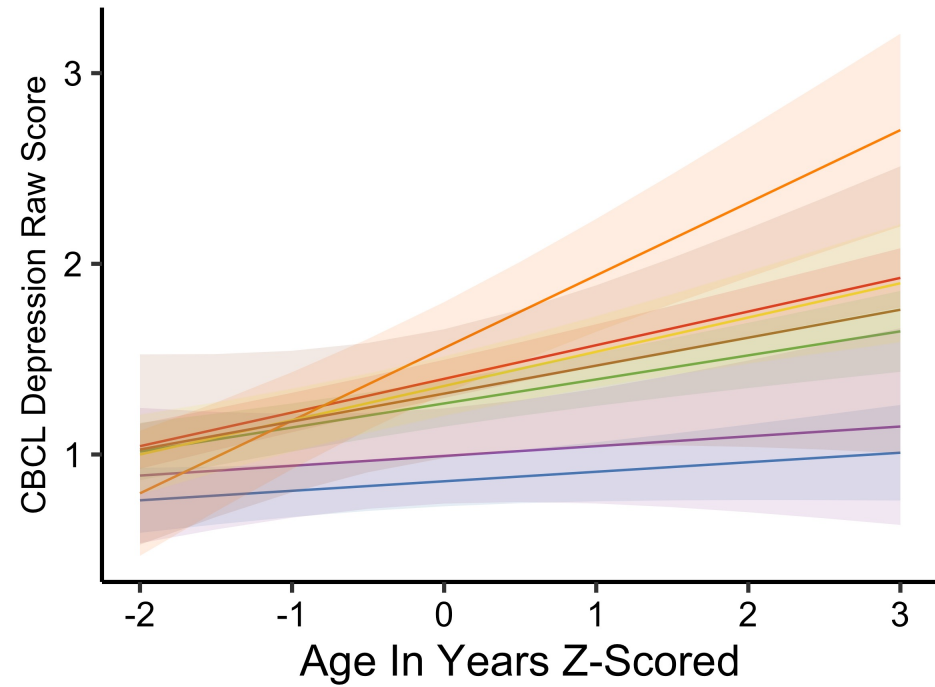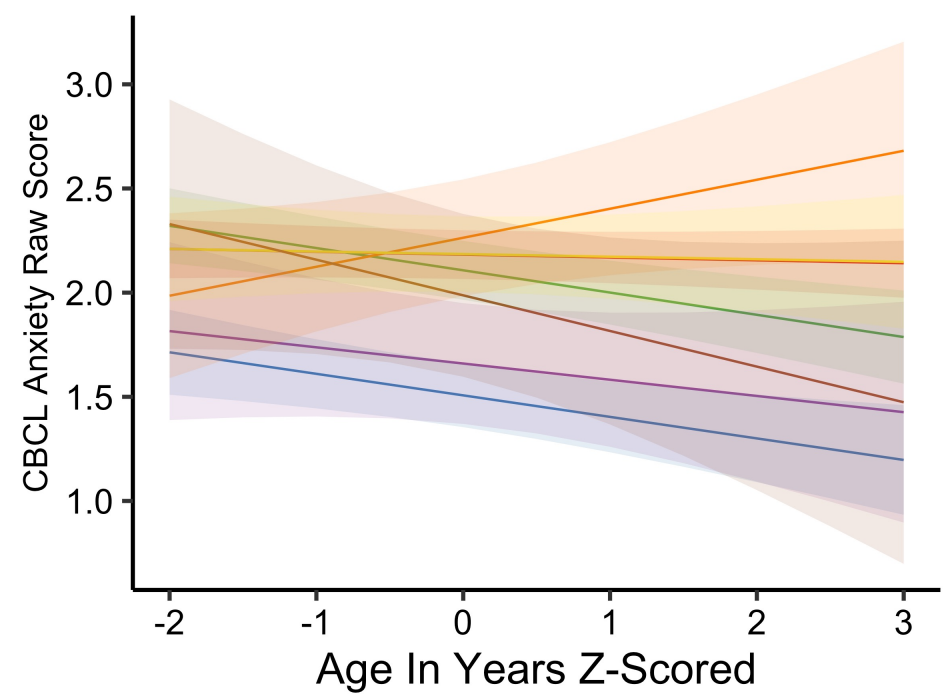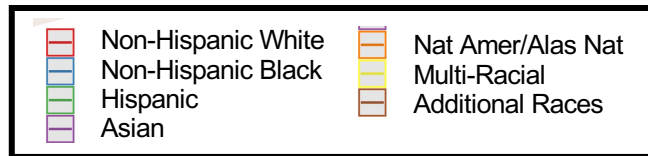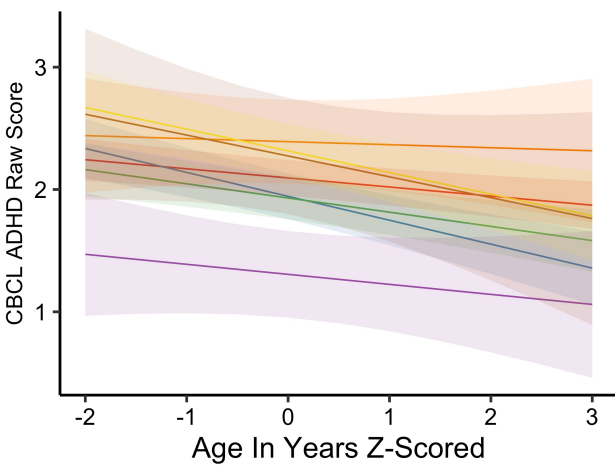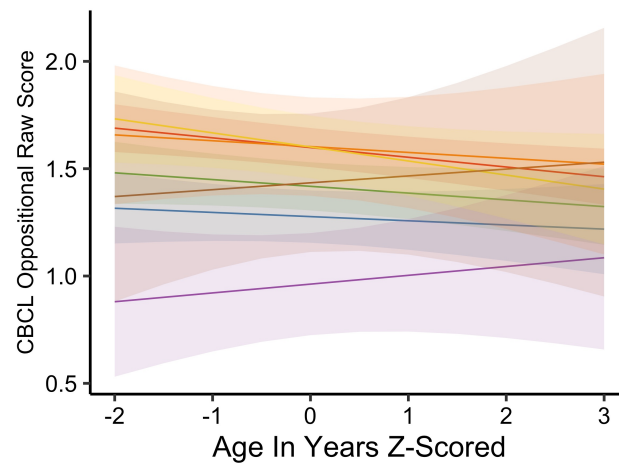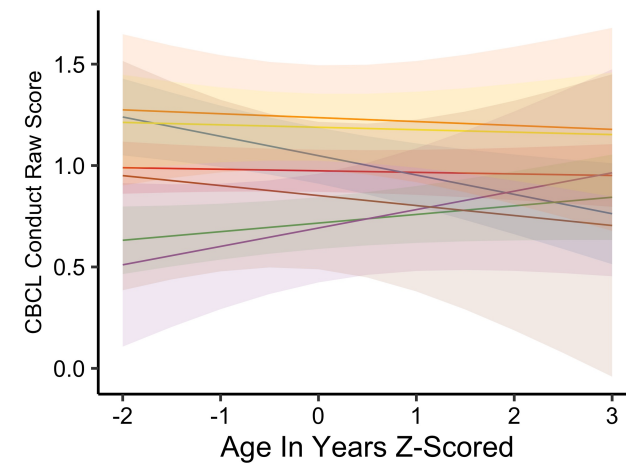



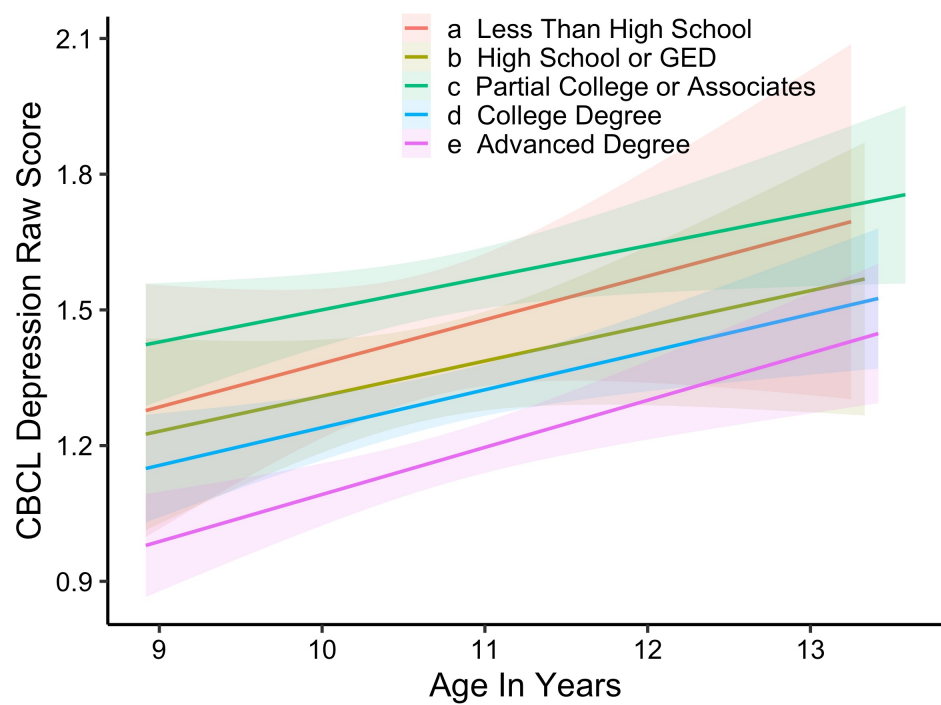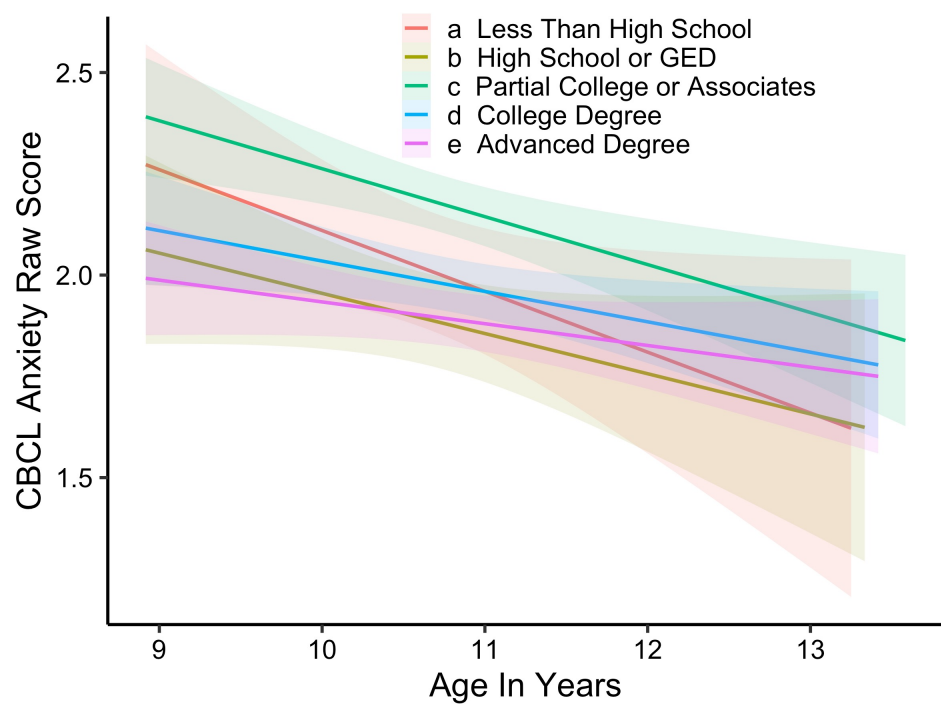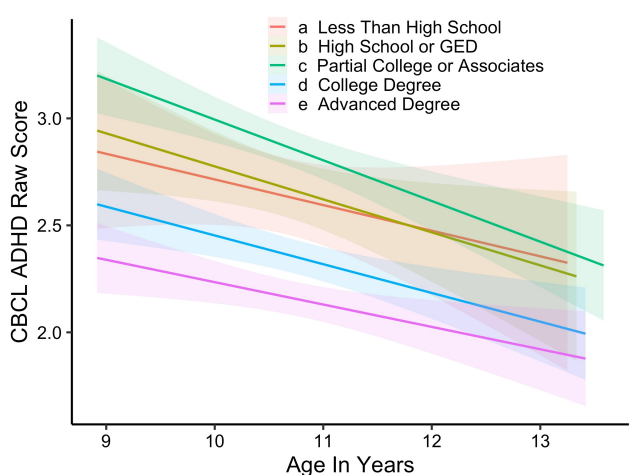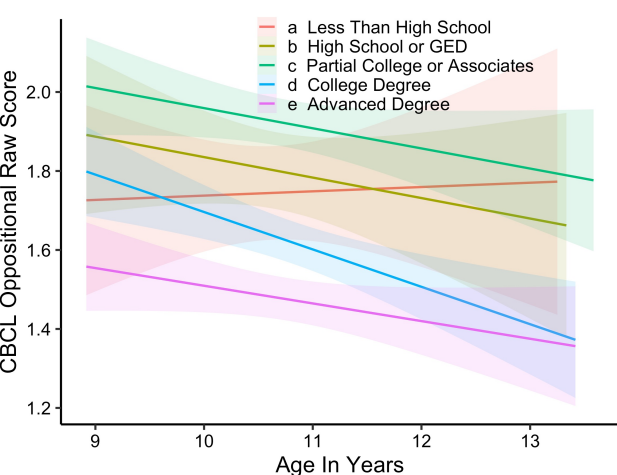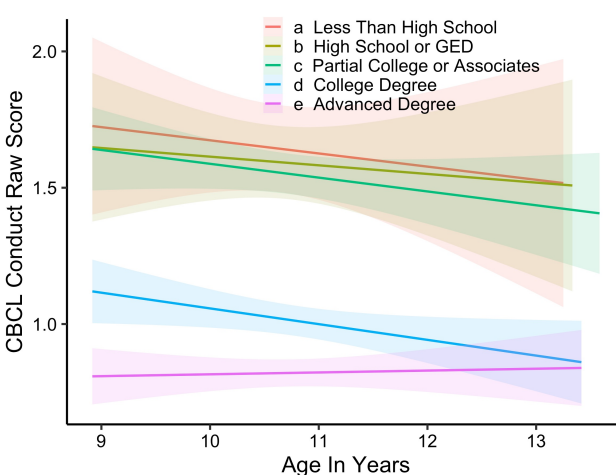

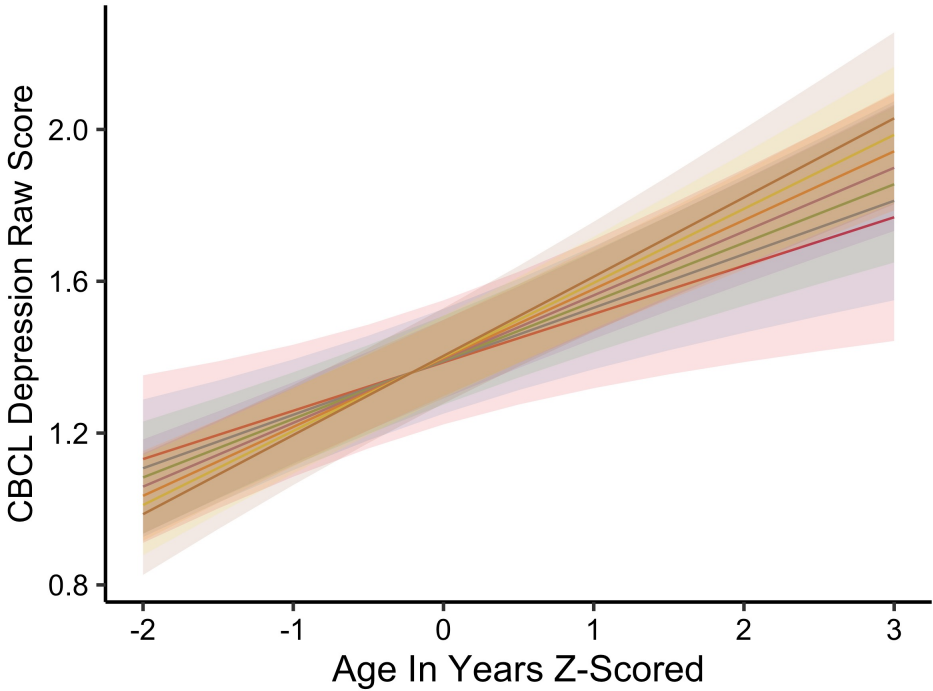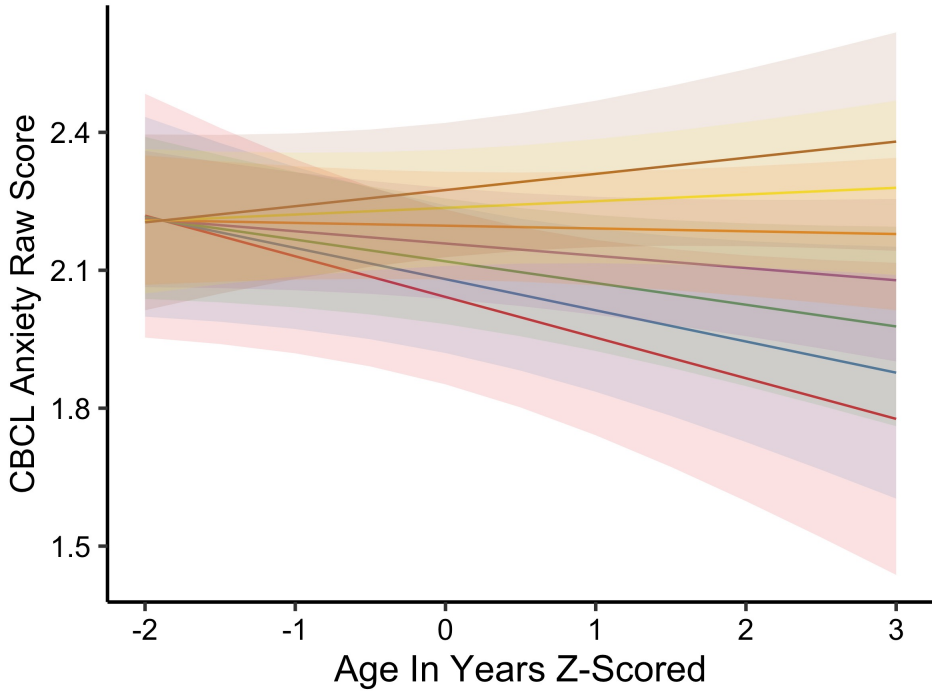

- 8<sup>th</sup> Grade or Less
- Partial High School
- High School or GED
- Partial College
- Associate's Degree
- College Degree
- Advanced Degree

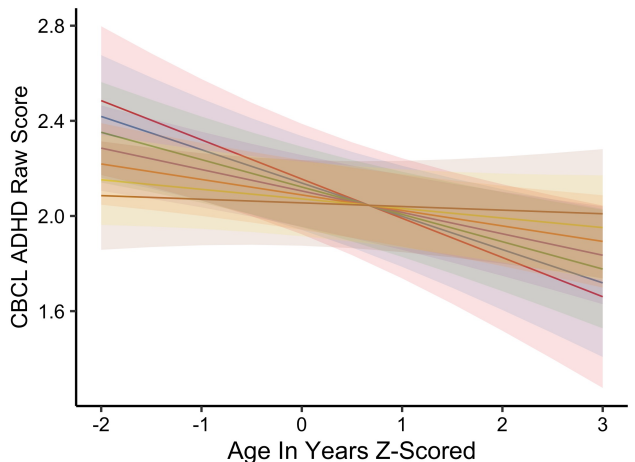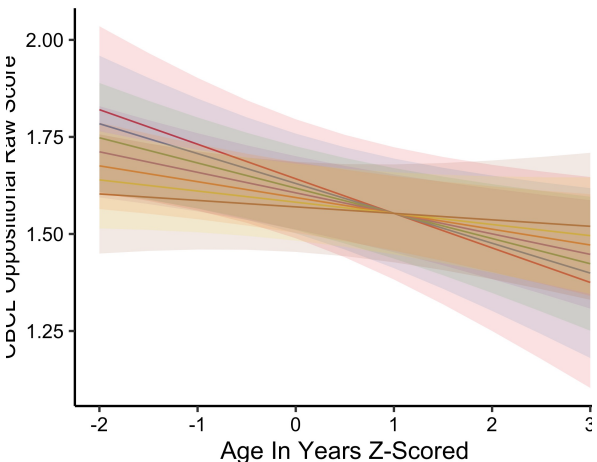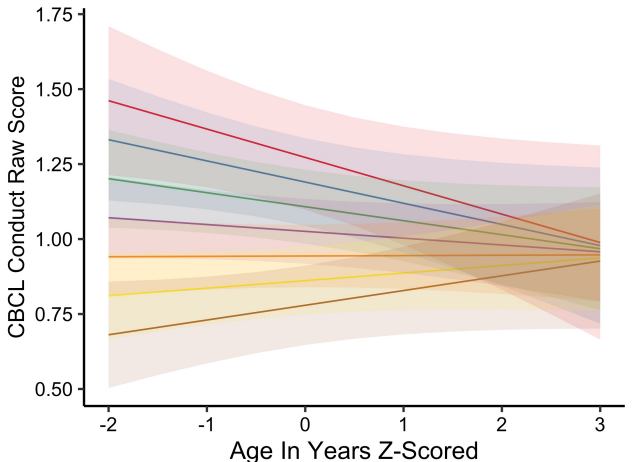

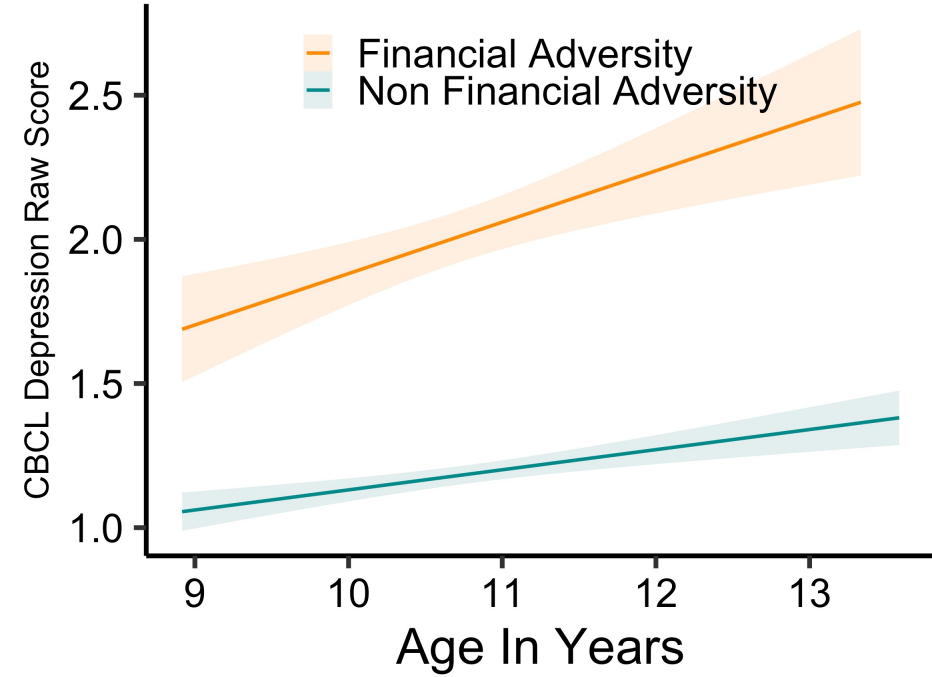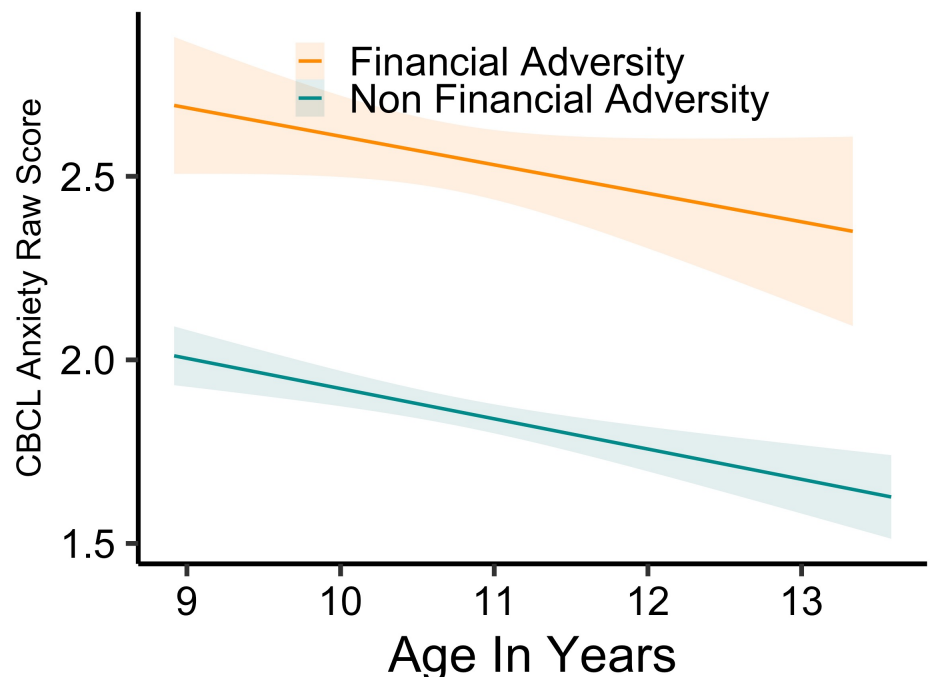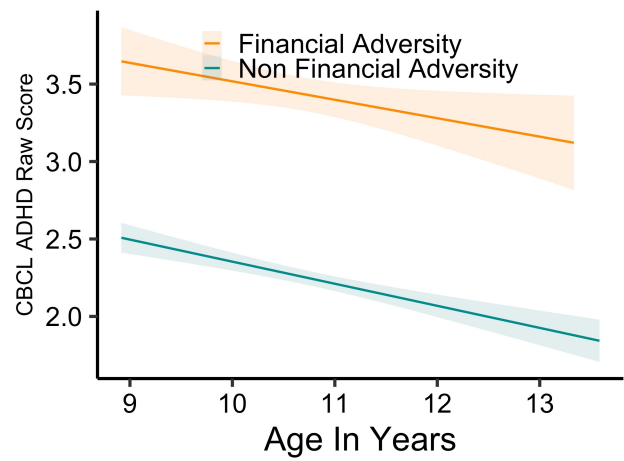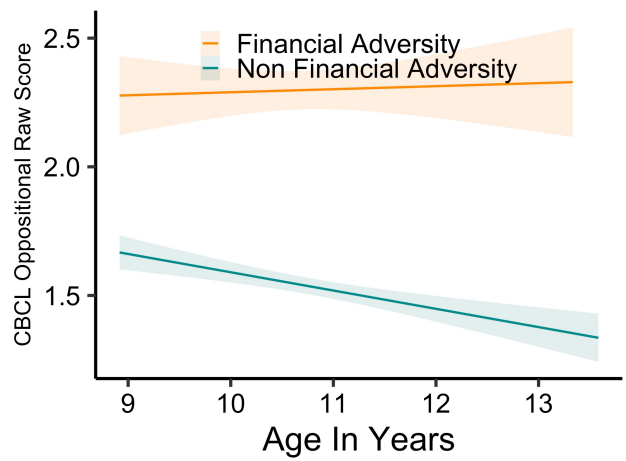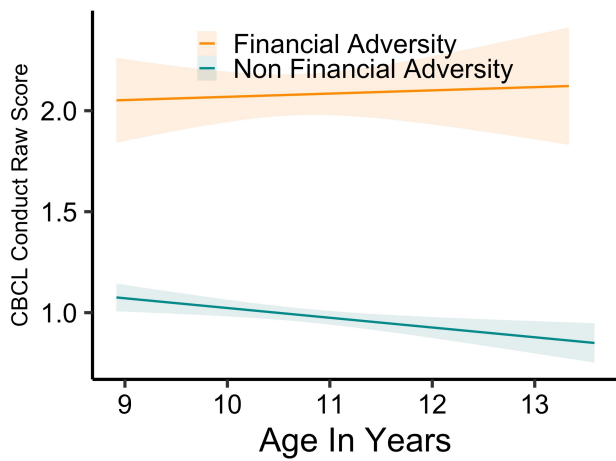

Supplement: mmc1.pdf [file mmc1.pdf]
